25 Department of Ecology and Evolutionary Biology

26 University of California, Los Angeles

27 621 Charles E. Young Drive South

28 Los Angeles, CA 90095-1606

29 (310)-825-7636

30 klohmueLLer@ucla.edu

31

32 **Abstract:** Dominance is a fundamental concept in molecular genetics and has implications for  
33 understanding patterns of genetic variation, evolution, and complex traits. However, despite its  
34 importance, the degree of dominance has yet to be quantified in natural populations. Here, we  
35 leverage multiple mating systems in natural populations of *Arabidopsis* to co-estimate the  
36 distribution of fitness effects and dominance coefficients of new amino acid changing mutations.  
37 We find that more deleterious mutations are more likely to be recessive than less deleterious  
38 mutations. Further, this pattern holds across gene categories, but varies with the connectivity and  
39 expression patterns of genes. Our work argues that dominance arose as the inevitable  
40 consequence of the functional importance of genes and their optimal expression levels.

41

42 **One sentence summary:** We use population genomic data to characterize the degree of  
43 dominance for new mutations and develop a new theory for its evolution.

44

45 **Main Text:** The relationship between the fitness effects of heterozygous and homozygous  
46 genotypes at a locus, termed dominance, is the major factor that determines the fate of new  
47 alleles in a population and has far reaching implications for genetic diseases and evolutionary  
48 genetics (1–4). Several models have been theorized for the mechanism of dominance, starting

49 with R.A. Fisher's model, which suggests that dominance arises via modifier mutations at other  
50 loci and that these loci are subject to selection (5). In response, S. Wright argued that selection  
51 would not be strong enough to maintain these modifier mutations. He proposed a different model  
52 (termed the “metabolic theory”), later extended by Kacser and Burns, predicting most mutations  
53 in enzymes will be recessive because the reduced activity of mutant alleles can be masked by the  
54 wild type allele in heterozygotes (6, 7). An alternative model, posited by Haldane and further  
55 developed by Hurst and Randerson, suggested that recessivity is a consequence of selection for  
56 higher amounts of enzyme product because enzymes expressed at higher levels are able to  
57 tolerate loss of function (LoF) mutations (8, 9).

58

59 The Wright and Haldane models predict that there is a negative relationship between the  
60 dominance coefficient ( $h$ ) and the selection coefficient ( $s$ ), such that more deleterious mutations  
61 will tend to be recessive, while Fisher’s model makes no such prediction. *Drosophila* mutation  
62 accumulation lines showed evidence of this relationship, providing the first empirical evidence  
63 that Fisher's theory may not hold (10–12). While the predictions of the Wright and Haldane  
64 models may be applicable to enzymes, they fail to explain the mechanism of dominance in  
65 noncatalytic gene products (13). Further, the extent to which these estimates apply to the  
66 majority of mutations occurring in natural populations remains to be tested. While population  
67 genetic approaches to estimate the degree of dominance from segregating genetic variation exist  
68 (14, 15), they have not been widely applied to empirical data nor have they been used to test  
69 models regarding the evolution of dominance.

70

71 A major challenge to studying dominance in natural populations is that  $h$  is inherently  
72 confounded with the distribution of fitness effects (DFE) such that different values of  $h$  and  
73 DFEs can yield similar patterns in the genetic variation data in a single outcrossing population  
74 (Fig. 1A). However, these same models can be distinguished from each other by studying  
75 organisms that undergo self-fertilization as selection will have the chance to immediately act on  
76 recessive homozygotes (Fig. 1B). Here, we leverage this fact by developing a composite  
77 likelihood approach, which uses the site frequency spectrum (SFS) of the outcrossing *A. lyrata*  
78 and the selfing *A. thaliana* (Fig. 1C) to co-estimate the DFE and distribution of  $h$  for new  
79 nonsynonymous mutations on recently published datasets from both species (16–18).

80

81 We compare the fit of 3 distinct models of dominance effects to the SFS from both populations  
82 of *Arabidopsis* (Fig. 1D). We find that a model where mutations are slightly recessive (inferred  
83  $h=0.46$ ) results in a significantly better fit than assuming a model where all mutations are  
84 additive (Fig. 2A). The third model allows  $h$  to depend on  $s$  (Fig. 1D), and we infer that this  
85 model fits the SFS significantly better than a model with a constant  $h$  ( $P < 1 \times 10^{-15}$ ; Fig. 2A) (18).  
86 Importantly, mutations that are more deleterious also tend to be more recessive (Fig. 2B). For  
87 example, mutations with  $s < -0.001$  have an  $h < 0.025$ , suggesting that even moderately deleterious  
88 mutations are quite recessive. However, because very strongly deleterious mutations ( $s < -0.01$ )  
89 are unlikely to be segregating in the data, we have limited resolution to infer the dominance  
90 effects for such mutations.

91

92 To determine whether our statistical framework is sensitive to certain confounders and can  
93 reliably distinguish between competing models, we carried out extensive forward simulations

94 based on the demographic models inferred from our data (table S1, fig. S1)(18). The distribution  
95 of the likelihood ratio test (LRT) statistic in simulations where all mutations were additive  
96 resembled the predicted asymptotic chi-square distribution when comparing the constant  $h \neq 0.5$   
97 model to the additive model (df=1, Fig. 2C) as well as when comparing the  $h$ - $s$  relationship  
98 model to the additive model (df=2, Fig. 2D). Importantly, none of the LRT statistics were as  
99 large as those seen empirically (Fig. 2A), suggesting a conservative simulation-based  $P$ -value  
100  $< 0.01$ . When simulating data under the constant  $h$  model ( $h=0.46$ , Fig. 2C) as well as the  $h$ - $s$   
101 relationship model, we find that the distribution of the LRT statistic is much greater than that of  
102 the null data (Fig. 2D). These simulations suggest we have excellent power to distinguish  
103 between models given the demographic history, sample size, and amounts of genetic variation  
104 present in these species. Lastly, our simulations show that differing DFEs between *A. thaliana*  
105 and *A. lyrata* would not provide false evidence of the  $h$ - $s$  relationship (18) (fig. S2, tables S2 and  
106 S3). In sum, it is unlikely that our conclusion of extensive recessivity of mutations and the  
107 relationship between dominance effects and selective effects is driven by artifacts of our  
108 inference procedure.

109

110 We next sought to test which theoretical model for the evolution of dominance can explain our  
111 data. Fisher's theory for the evolution of dominance predicts that  $h$  should show no relationship  
112 to the degree of deleteriousness of a mutation (5). Our finding of the  $h$ - $s$  relationship is not  
113 consistent with this theory. The metabolic theory (7) predicts that mutations in catalytic genes  
114 ought to be more recessive than those in genes unlikely to be involved in enzyme kinetics. We  
115 classified genes based on Gene Ontology (GO) category and inferred the DFE and  $h$  on specific  
116 gene sets (18) (tables S3 and S4). Overall, we find that catalytic genes display similar patterns of

117 polymorphism (fig. S4) and an  $h$ - $s$  relationship, as seen genome-wide (Fig. 3A). Genes encoding  
118 structural proteins (herein “structural genes”), which are unlikely to be involved in enzyme  
119 kinetics, however, show a higher proportion of rare variants in the SFS (fig. S4) and appear to be  
120 less recessive than catalytic genes (Fig. 3A). In other words, for a given selection coefficient,  
121 mutations in catalytic genes tend to be more recessive than those in structural genes. On the  
122 surface, this finding appears to support the prediction of the metabolic theory of dominance.  
123 However, we infer that the  $h$ - $s$  relationship model fits the structural genes better than the constant  
124  $h$  model or the additive model (Fig. 3C, table S3). Thus, even structural genes show evidence of  
125 recessive mutations, which is not predicted under the metabolic theory model. We note that this  
126 finding has previous experimental support in yeast (13, 19).

127

128 To investigate other mechanisms that could lead to recessive mutations in structural genes, we  
129 classified genes based on their expression level and degree of connectivity in networks (18).  
130 Overall, we found that structural genes tended to be more highly expressed and have more  
131 network connections than other types of genes (Fig. 3B). We next tested whether the parameters  
132 of the  $h$ - $s$  relationship differed across these different functional categories (Fig. 3C and 3D, figs.  
133 S7 and S8, tables S3 and S4). While the  $h$  intercept did not differ across any of the categories  
134 (Fig. 3D, fig. S7), we found that the  $h$ - $s$  decay rate, or slope, of the relationship between  $h$  and  $s$   
135 did vary across some groupings. Specifically, the decay rate was significantly larger for catalytic  
136 genes than for any of the other categories, again indicating that mutations in these genes tend to  
137 be more recessive than those in other genes. Genes that were more highly expressed and those  
138 that tended to be more connected had a smaller decay parameter, indicating that mutations in  
139 these genes tended to be more additive (Fig. 3C and 3D). Strikingly, we could not reject a model

140 where structural genes had the same decay parameter as highly connected genes and non-  
141 structural genes that are both highly connected and have high levels of expression (Fig. 3D).  
142 These results argue that structural genes do not appear to have a unique  $h$ - $s$  relationship. Rather  
143 they share the properties of other genes that are both highly connected and have a high level of  
144 expression.

145

146 Our results motivate further development of a more general model for dominance. We extended  
147 the model of Hurst and Randerson (9). In our model, fitness,  $f(x)$ , for a given level of gene  
148 expression  $x$ , is described by:

149 
$$f(x) = \frac{(x + \text{intercept} \times \text{scale})(1 - \text{cost} \times x)}{x + \text{scale}},$$

150 where the *intercept* relates to the functional importance of a given gene and together with the  
151 *scale*, determines the optimal expression level of the gene. We assume that gene expression  
152 comes at a fixed *cost* per unit expression level. We compute  $s$  and  $h$  from this model based on  
153 how reducing the expression level by one half (for heterozygotes) or completely (for the  
154 homozygotes) affects fitness (18) (fig. S11). Under this model, a non-essential gene where few  
155 molecules are needed for optimal function (solid blue curve in Fig. 4A) will have a wild-type  
156 fitness at a low expression level (solid point). Reducing the amount of active protein by one half  
157 (the assumed impact of a deleterious heterozygous mutation) will only slightly decrease fitness,  
158 resulting in a recessive mutation. In contrast, for an essential gene where many molecules are  
159 needed, the fitness function will be much flatter and the optimal expression will be much higher  
160 (dashed yellow curve in Fig. 4A). Here, reducing the amount of active protein by one half will  
161 result in a larger decrease in fitness, implying that mutations will be more additive. Simulations  
162 under our model (18) recapitulate the key features seen in our empirical data (Fig. 4B and Fig.

163 4C). Specifically, while all genes are predicted to show a  $h$ - $s$  relationship under our model (fig.  
164 S12), this relationship will be less-steep in genes with a higher optimal expression level (orange  
165 points in Fig 4B), indicating that for a given selection coefficient, genes with high expression  
166 will tend to be more additive. Stratifying by realized gene expression level shows qualitatively  
167 similar patterns—mutations in genes with higher expression levels are predicted to be more  
168 additive (Fig. 4C).

169

170 Overall, our work provides a fine-scale molecular population genetic demonstration using  
171 genetic variation data from natural populations that more deleterious mutations tend to be more  
172 recessive than less deleterious mutations. Further, while finding some support for the popular  
173 metabolic network theory of dominance, we find that it is insufficient to explain patterns of  
174 dominance in all types of genes. Rather, our results support a more general model for the  
175 occurrence of dominance. Specifically, our findings suggest that dominance and the  $h$ - $s$   
176 relationship arose as a natural and inevitable outcome of the functional importance of genes and  
177 their optimal expression level. In addition, under our model, dominance can evolve in haploid  
178 organisms, passing a previous test of the evolution of dominance that rejected both Fisher's and  
179 Haldane's original models (20).

180

181 Our findings have implications for evolutionary and medical genetic studies. First, many  
182 deleterious mutations tend to be recessive, and may accumulate in heterozygotes and be  
183 maintained in populations, which could increase the role of population history in affecting  
184 patterns of deleterious mutations and the genetic load (1, 2). Second, the location of a gene in a  
185 biological network and optimal expression level will influence both the selection coefficient and



186 degree of dominance of that mutation, indicating that mutations in certain genes may be more  
187 prone to having fitness effects and being potentially involved in complex traits, consistent with  
188 the recently proposed omnigenic model (21).

## 189 **References and Notes**

- 190 1. B. M. Henn, L. R. Botigué, C. D. Bustamante, A. G. Clark, S. Gravel, Estimating the  
191 mutation load in human genomes. *Nat. Rev. Genet.* **16**, 333–343 (2015).
- 192 2. Y. B. Simons, G. Sella, The impact of recent population history on the deleterious mutation  
193 load in humans and close evolutionary relatives. *Curr. Opin. Genet. Dev.* **41**, 150–158  
194 (2016).
- 195 3. K. M. Teshima, M. Przeworski, Directional positive selection on an allele of arbitrary  
196 dominance. *Genetics.* **172**, 713–718 (2006).
- 197 4. J. S. Sanjak, A. D. Long, K. R. Thornton, A model of compound heterozygous, loss-of-  
198 function alleles is broadly consistent with observations from complex-disease GWAS  
199 datasets. *PLOS Genet.* **13**, e1006573 (2017).
- 200 5. R. A. Fisher, The possible modification of the response of the wild type to recurrent  
201 mutations. *Am. Nat.* **62**, 115–126 (1928).
- 202 6. S. Wright, Fisher’s theory of dominance. *Am. Nat.* **63**, 274–279 (1929).
- 203 7. H. Kacser, J. A. Burns, The molecular basis of dominance. *Genetics.* **97**, 639–666 (1981).
- 204 8. J. B. S. Haldane, A note on Fisher’s theory of the origin of dominance, and on a correlation  
205 between dominance and linkage. *Am. Nat.* **64**, 87–90 (1930).
- 206 9. L. D. Hurst, J. P. Randerson, Dosage, deletions and dominance: simple models of the  
207 evolution of gene expression. *J. Theor. Biol.* **205**, 641–647 (2000).
- 208 10. T. Mukai, S. I. Chigusa, L. E. Mettler, J. F. Crow, Mutation rate and dominance of genes  
209 affecting viability in *Drosophila melanogaster*. *Genetics.* **72**, 335–355 (1972).
- 210 11. M. J. Simmons, J. F. Crow, Mutations affecting fitness in *Drosophila* populations. *Annu.*  
211 *Rev. Genet.* **11**, 49–78 (1977).
- 212 12. B. Charlesworth, Evidence against Fisher’s theory of dominance. *Nature.* **278**, 848–849  
213 (1979).
- 214 13. N. Phadnis, J. D. Fry, Widespread correlations between dominance and homozygous effects  
215 of mutations: implications for theories of dominance. *Genetics.* **171**, 385–392 (2005).

- 216 14. S. Williamson, A. Fledel-Alon, C. D. Bustamante, Population genetics of polymorphism  
217 and divergence for diploid selection models with arbitrary dominance. *Genetics*. **168**, 463–  
218 475 (2004).
- 219 15. D. J. Balick, R. Do, C. A. Cassa, D. Reich, S. R. Sunyaev, Dominance of deleterious alleles  
220 controls the response to a population bottleneck. *PLOS Genet.* **11**, e1005436 (2015).
- 221 16. P. Y. Novikova *et al.*, Sequencing of the genus *Arabidopsis* identifies a complex history of  
222 nonbifurcating speciation and abundant trans-specific polymorphism. *Nat. Genet.* **48**, 1077–  
223 1082 (2016).
- 224 17. A. Durvasula *et al.*, African genomes illuminate the early history and transition to selfing in  
225 *Arabidopsis thaliana*. *Proc. Natl. Acad. Sci.* **114**, 5213–5218 (2017).
- 226 18. Materials and methods are available as supplementary materials.
- 227 19. A. F. Agrawal, M. C. Whitlock, Inferences about the distribution of dominance drawn from  
228 yeast gene knockout data. *Genetics*. **187**, 553–566 (2011).
- 229 20. H. A. Orr, A test of Fisher’s theory of dominance. *Proc. Natl. Acad. Sci.* **88**, 11413–11415  
230 (1991).
- 231 21. E. A. Boyle, Y. I. Li, J. K. Pritchard, An expanded view of complex traits: from polygenic  
232 to omnigenic. *Cell*. **169**, 1177–1186 (2017).

233

## 234 **Acknowledgements**

235 The data used in this paper is archived at the European Nucleotide Archive study accession  
236 numbers PRJEB19780 and PRJNA284572. The code used for analysis is available at  
237 [www.github.com/LohmuellerLab/dominance](http://www.github.com/LohmuellerLab/dominance). We thank Dan Balick for detailed comments on  
238 the manuscript. This work was supported by a Searle Scholars Fellowship and NIH Grant  
239 R35GM119856 (to K.E.L.).

240

## 241 **Figures**

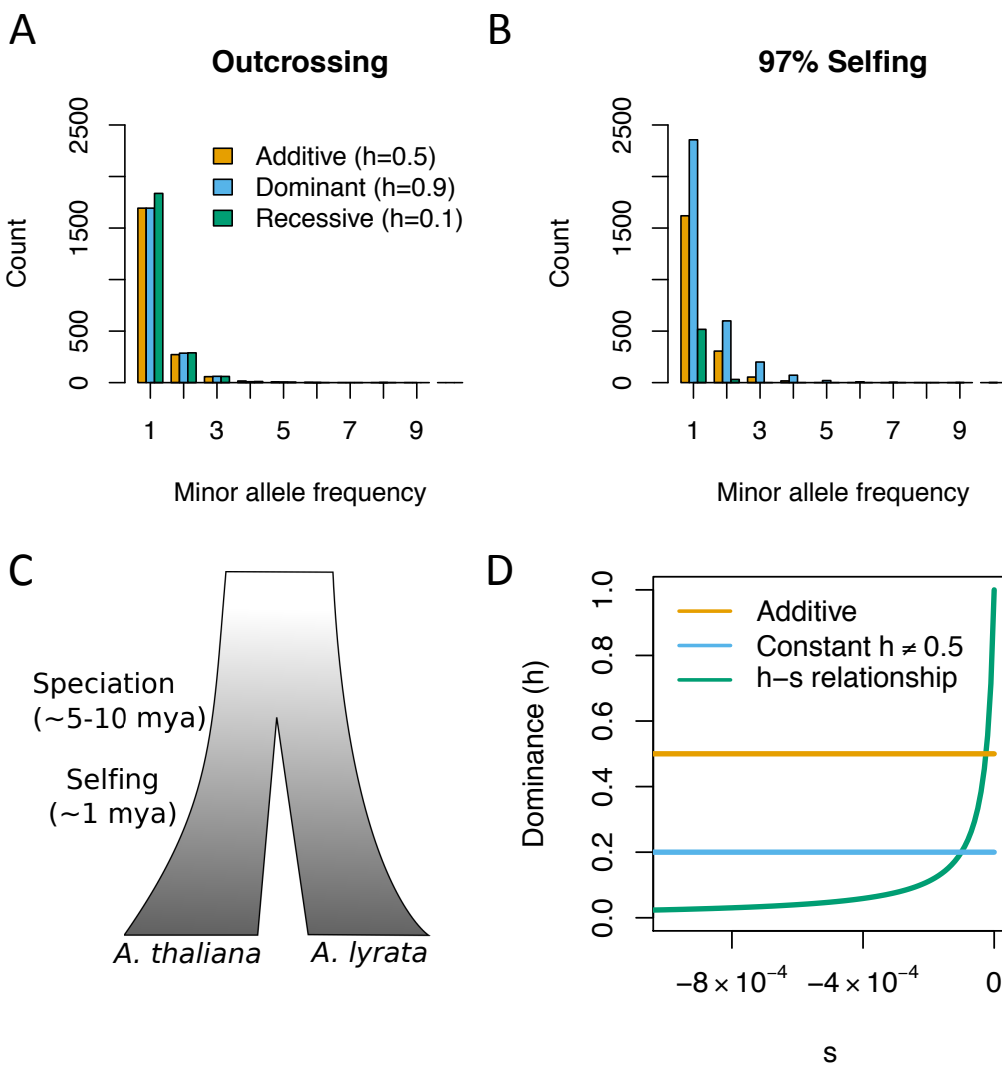

242

243 **Fig 1. The effect of dominance and mating system on the site frequency spectrum (SFS).**

244 (A) The SFS from an outcrossing species simulated under different DFEs and  $h$  values. Note that

245 different combinations of DFEs and values of  $h$  yield similar SFS. (B) The SFS for the same

246 DFEs and values of  $h$  as in (A) for a highly selfing species. Differences in  $h$  result in large

247 differences in the SFS in selfing species, allowing us to reliably co-estimate the DFE and  $h$ . (C)

248 A schematic of the species history between *A. thaliana* and *A. lyrata*. (D) Examples of the

249 relationship between  $h$  and  $s$  under the three different models of dominance tested here.

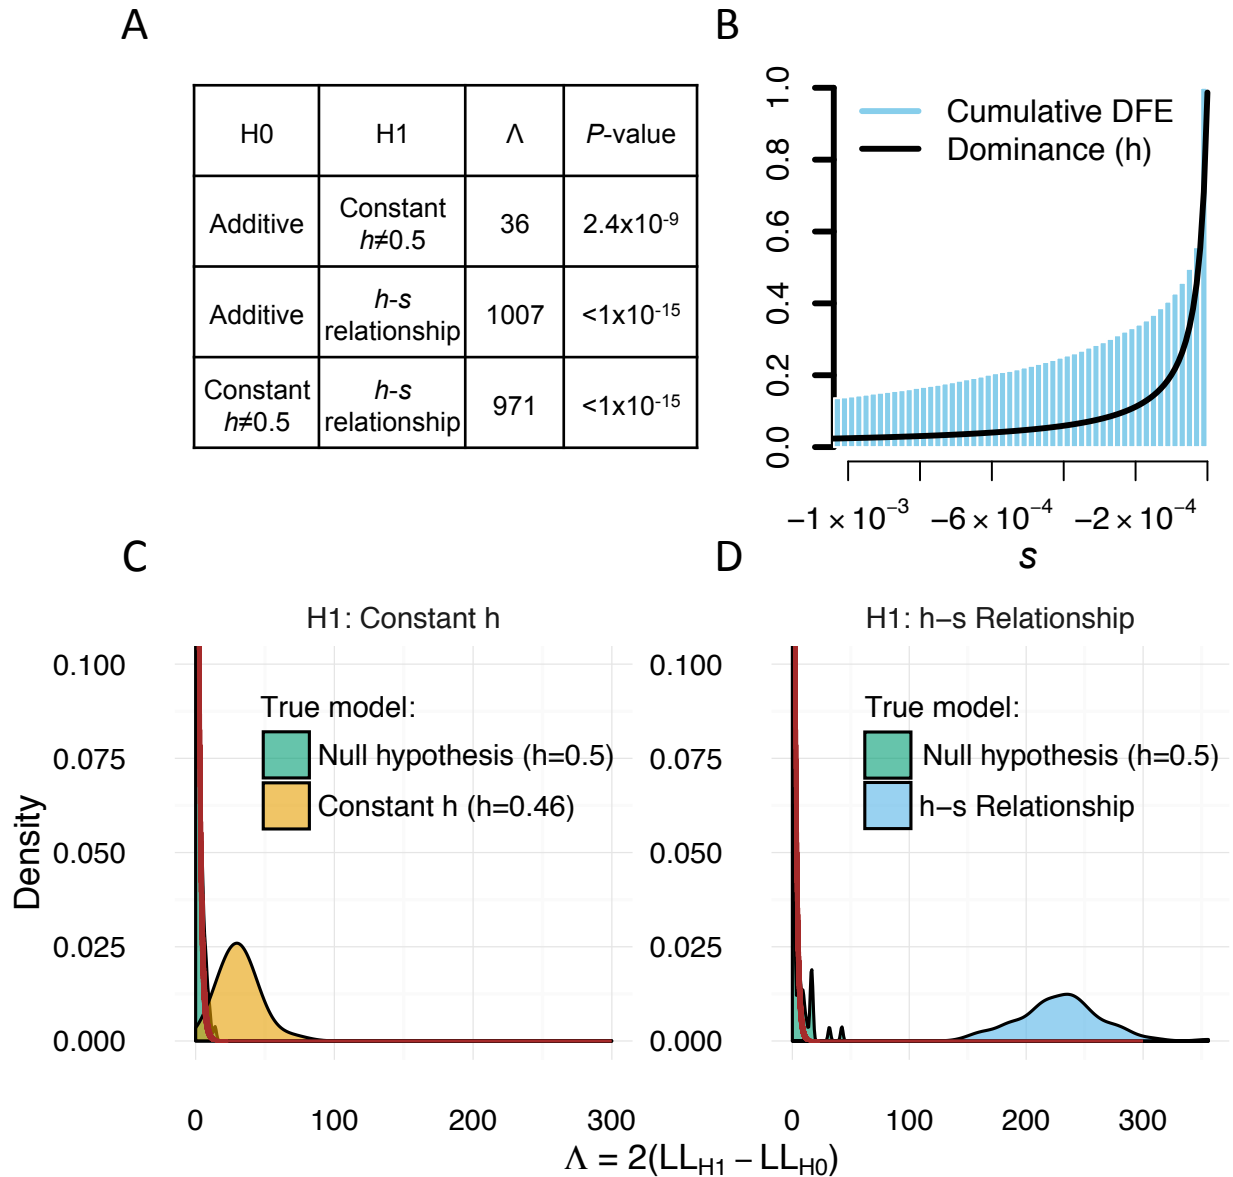

250

251 **Fig 2. Genome-wide estimates of dominance. (A)** Likelihood ratio test statistics ( $\Lambda$ ) and  $P$ -

252 values when comparing different models of dominance. The  $h$ - $s$  relationship fits the data

253 significantly better than the additive model and significantly better than a model with a single

254 dominance coefficient. **(B)** Inferred relationship between  $h$  and  $s$  based on whole genome data.

255 More nearly neutral mutations tend to be more dominant than strongly deleterious mutations. **(C,**

256 **D)** Simulations demonstrating the performance of our inference procedure. **(C)** Likelihood ratio

257 tests comparing a constant  $h$  model to an additive model. When data are simulated under an

258 additive model (green),  $\mathcal{A}$  nearly follows a chi-square (1 *df*) distribution (red line). However,  
259 when the data are simulated under a model with  $h=0.46$  (tan), the distribution of  $\mathcal{A}$  is  
260 substantially larger, indicating excellent statistical power. **(D)** Likelihood ratio tests comparing  
261 the  $h$ - $s$  relationship model to an additive model. When data are simulated under an additive  
262 model (green),  $\mathcal{A}$  nearly follows a chi-square (2 *df*) distribution (red line). However, when the  
263 data are simulated under the  $h$ - $s$  relationship model (tan), the distribution of  $\mathcal{A}$  is substantially  
264 larger, indicating excellent statistical power.  
265

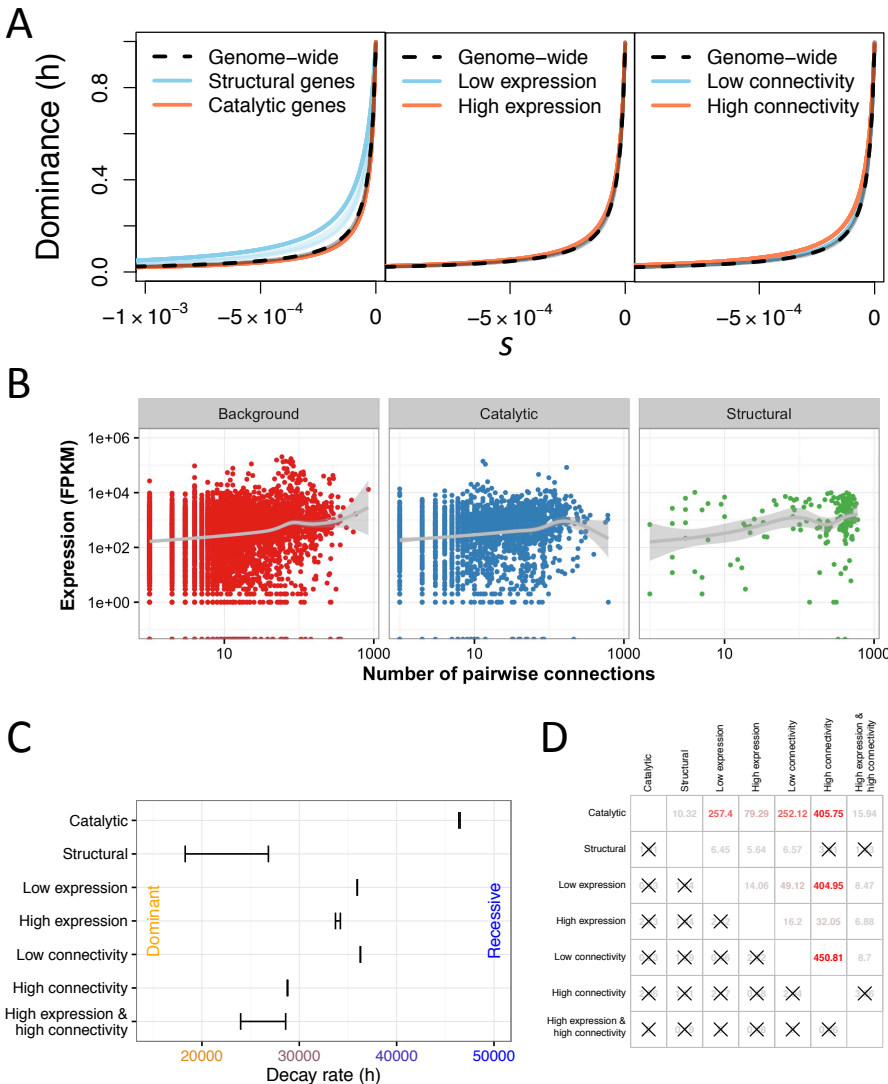

266

267 **Fig 3. Distribution of dominance per gene category. (A)**  $h$ - $s$  relationship inferred for different

268 gene categories. Bootstrap replicates are shown in lighter colors. **(B)** Expression profiles are

269 correlated with gene connectivity. Note that structural genes have higher connectivity and

270 expression than do other types of genes. Background refers to genes not in catalytic or structural

271 GO categories. **(C)** Differences in the decay rate of  $h$  across gene categories. 95% confidence

272 intervals (CI) are shown. Larger decay rates indicate that for a given value of  $s$ , mutations tend to

273 be more recessive. **(D)** Z-scores for tests of differences in decay rate (upper triangle) and

274 intercept (lower triangle) between different categories of genes. Color indicates degree of

275 significance (red is more significant). Comparisons not significantly different after Bonferroni  
276 correction are denoted by “X”s.  
277

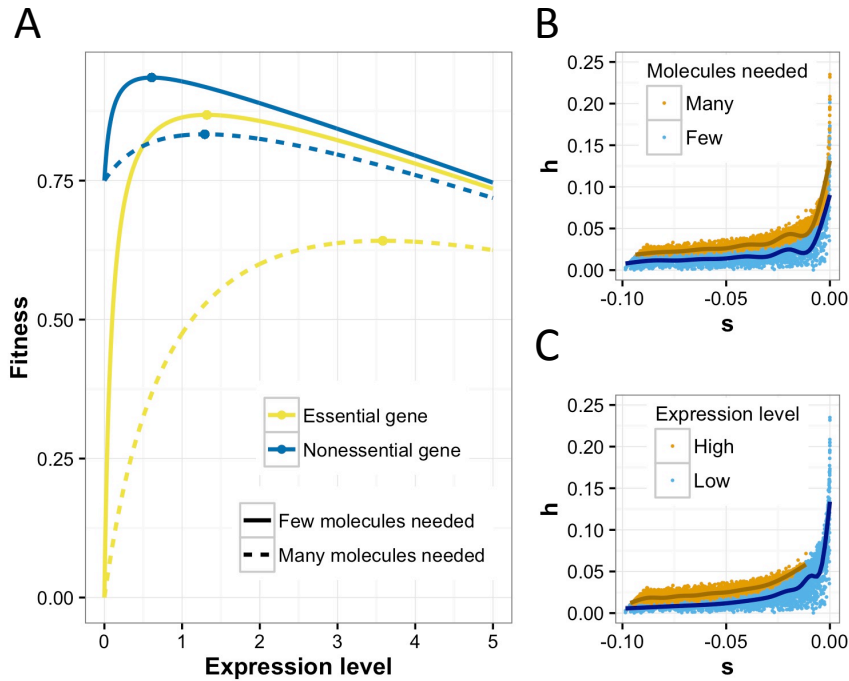

278

279

**Fig 4. A new, comprehensive model for the evolution of dominance. (A)** The relationship

280 between fitness and expression level (arbitrary units). Note, a fitness cost for increasing gene

281 expression is assumed (see 18). **(B)** Predicted  $h$ - $s$  relationship when many molecules (orange)

282 and few molecules (blue) are needed. **(C)** Predicted  $h$ - $s$  relationship when the expression level is

283 high (orange) and low (blue). Note that the patterns predicted in **(B and C)** mirror those seen

284 empirically in our analysis.



285  
286  
287  
288  
289  
290  
291  
292  
293  
294  
295  
296  
297  
298  
299  
300  
301

## Supplementary Materials for

### Gene expression drives the evolution of dominance

Christian D. Huber, Arun Durvasula, Angela M. Hancock, Kirk E. Lohmueller

correspondence to: [chuber53@ucla.edu](mailto:chuber53@ucla.edu), [klohmueller@ucla.edu](mailto:klohmueller@ucla.edu)

**This PDF file includes:**

Materials and Methods  
Figs. S1 to S12  
Tables S1 to S4  
References 22-50

## 302 **Materials and Methods**

### 303 Data

304 We collected sequencing data for 13 *A. lyrata* plants from Novikova et al 2016 (16) and  
305 sequencing data for 16 *A. thaliana* plants from Durvasula et al 2017 (17). We aligned accessions  
306 to their respective genomes (*A. thaliana* to TAIR10 (22) and *A. lyrata* to the JGI reference  
307 sequence v1.0 (23)) using BWA-MEM (BWA 0.7.7-r441) (24) with a penalty of 15 for unpaired  
308 read pairs. We removed duplicated reads using Picard v2.7 and performed local indel  
309 realignment using Genome Analysis Toolkit (GATK v3.6) IndelRealigner (25). We called SNPs  
310 using UnifiedGenotyper and filtered variants using the recommendations from GATK:

311  
312  $QualByDepth < 2.0 \parallel FisherStrand > 60.0 \parallel RMSMappingQuality < 40.0 \parallel$   
313  $MappingQualityRankSumTest < -12.5 \parallel ReadPosRankSum < -8.0 \parallel StrandOddsRatio > 3.0 \parallel$   
314  $HaplotypeScore > 13.0$

315  
316 We annotated SNPs using SnpEff v4.3a (26). We used gene annotations (TAIR10) to filter  
317 only coding sequences (CDS) and created site frequency spectra (SFS) for synonymous and  
318 nonsynonymous variants separately. We calculated folded SFSs in order to avoid assigning an  
319 ancestral allele, which is difficult to do in these species due to extensive genome rearrangements  
320 (23). We downsampled the SFS in *A. lyrata* from 13 entries to 11 using a hypergeometric  
321 downsampling scheme (27).

322 We ensured that population structure did not affect our frequency spectra by performing  
323 principal components analysis (PCA) and checking the distribution of pairwise differences  
324 between samples. We removed samples that were highly related within each species as  
325 determined by outliers in the number of pairwise differences and individuals that cluster very  
326 closely on the PCA run on the genotypes (28) (Fig. S3). When two accessions were closely  
327 related, we retained one individual selected at random. For the *A. thaliana* dataset, we removed  
328 samples 35601, 35513, 35600, 37469 and for the *A. lyrata* dataset, we removed samples  
329 SRR2040788, SRR2040795, SRR2040829.

330 We annotated each coding site according to the gene name and gene ontology (GO) term  
331 and subset the data into different GO term categories to perform our inference of dominance and  
332 the DFE separately on these categories. We annotated each gene based on connectivity and gene  
333 expression. Connectivity was determined by the STRING database v10 (29). We downloaded the  
334 *A. thaliana* (organism 3702) protein network data and restricted our analysis to high confidence  
335 ( $>0.7$ ) interactions. Connectivity is then equally subdivided into three categories: low  
336 connectivity, intermediate connectivity, and high connectivity (e.g. Fig. 3). We obtained  
337 expression data for *A. thaliana* from the 1001 Epigenomes project (NCBI GEO: GSE80744;  
338 (30)), which provides a processed read count matrix for each gene across all accessions. We  
339 obtained the median expression value across all accessions, and arrived at a single value for each  
340 gene. Expression level is then equally subdivided into three categories: low expression,  
341 intermediate expression, and high expression (e.g. Fig. 3).

342

### 343 Models of dominance and likelihood ratio test

344 We test three different models of the relationship between the selection coefficient of a  
345 mutation ( $s$ ) and the dominance coefficient ( $h$ ). Here,  $s$  and  $h$  are defined such that the fitness of  
346 the homozygous wild-type genotype is 1, the fitness of the heterozygous genotype is  $1+hs$ , and

347 the fitness of the homozygous mutant genotype is  $1+s$ . The first model assumes that  $h$  is 0.5 and  
348 does not depend on  $s$  (additive model). The second model assumes that  $h$  is independent of  $s$ , but  
349 different from 0.5 (constant  $h$  model). This model allows for dominant or recessive mutations.  
350 The third model assumes a functional relationship between  $h$  and  $s$  ( $h$ - $s$  relationship model). We  
351 model this relationship with two parameters according to the following equation:

$$352 \quad 353 \quad h = f(s) = \frac{1}{\frac{1}{\theta_{intercept}} - \theta_{rate}s} \quad (1)$$

354  
355 The first parameter,  $\theta_{intercept}$ , defines the value of  $h$  at  $s = 0$ . The second parameter,  $\theta_{rate}$ ,  
356 defines how quickly  $h$  approaches zero with decreasing negative selection coefficient (see Fig.  
357 1D). We assume that  $\theta_{rate}$  is positive. Large positive values of  $\theta_{rate}$  imply that  $f(s)$  quickly  
358 approaches  $h=0$ , and even slightly deleterious mutations are recessive. Small positive values of  
359  $\theta_{rate}$  imply that only strongly deleterious mutations are recessive.

360 Overall, we assume that the DFE of new mutations (i.e. the distribution of  $s$ ) follows a  
361 gamma distribution (31–33). Thus, the additive model has two DFE parameters (shape and scale  
362 of the gamma DFE) and no dominance parameters, since we fix  $h$  to be 0.5. The constant  $h$   
363 model has one additional parameter, the value of  $h$ . The  $h$ - $s$  relationship model has two  
364 additional parameters,  $\theta_{intercept}$  and  $\theta_{rate}$ . Note that when  $\theta_{rate}$  approaches zero, the  $h$ - $s$  relationship  
365 model of eq. 1 converges to the constant  $h$  model, and when  $\theta_{rate}$  approaches zero and  $\theta_{intercept}$   
366 approaches 0.5, the model converges to the additive model. Thus, the three models are nested,  
367 and we can formulate a likelihood ratio test based on maximum log likelihoods (LL) comparing  
368 the three different dominance models. The test statistic  $\Lambda$  is defined as  $2(LL_{H1} - LL_{H0})$ , where  
369  $H_0$  is the null hypothesis (either additivity or constant  $h$ ) and  $H_1$  is the alternative hypothesis  
370 (either constant  $h$  or  $h$ - $s$  relationship). The statistic  $\Lambda$  is asymptotically chi-square distributed,  
371 with degrees of freedom equal to the difference in the number of parameters between the null  
372 and the alternative model. Thus, we formulate three different tests:

- 373  
374 1. Testing the constant  $h$  model ( $H_1$ ) against the additive model ( $H_0$ ).  
375 2. Testing the  $h$ - $s$  relationship model ( $H_1$ ) against the additive model ( $H_0$ ).  
376 3. Testing the  $h$ - $s$  relationship model ( $H_1$ ) against the constant  $h$  model ( $H_0$ ).  
377

### 378 Population genetic inference of dominance using data from a single outcrossing population

379 We developed a Poisson random-field model of polymorphisms (14) for estimating the  
380 parameters in the models described above. We assume that nonsynonymous mutations are under  
381 the effects of purifying selection, and we assume that synonymous mutations are neutral. We  
382 present two approaches to estimate these parameters from the data: 1) estimating dominance  
383 using data from a single outcrossing population (e.g. *A. lyrata*), and 2) using data from both an  
384 outcrossing (e.g. *A. lyrata*) and a highly inbreeding population (e.g. *A. thaliana*) simultaneously  
385 to estimate dominance. We start by presenting the first approach.

386 To account for the effects of changes in population size on the nonsynonymous SFS that  
387 might confound estimates of selection, we first estimate a demographic model using the  
388 synonymous SFS (34). Selection parameters are then estimated conditional on the estimated  
389 demographic model. Previous work has shown that this approach leads to unbiased estimates of  
390 the selection parameters by controlling for background selection, selective sweeps, and hidden  
391 population structure (32, 35).

392 In short, we infer the parameters of a population size change model using the synonymous  
393 site frequency spectrum (SFS) under the Poisson Random Field framework (see Huber et al. (32)  
394 and Kim et al. (35) for details). For both species that we analyzed (*A. lyrata* and *A. thaliana*), a  
395 three-epoch model with three discrete size changes fits better to the synonymous SFS than a two-  
396 epoch model or a constant population size model (Table S1, Fig. S1). Thus, all subsequent  
397 inferences use the three-epoch model.

398 Conditional on the estimated demographic parameters of the three-epoch model, we next  
399 use the nonsynonymous SFS to estimate the selection parameters, i.e. the shape and scale  
400 parameter of a gamma distributed DFE ( $\Theta_{DFE}$ ), and the rate and intercept parameter of the  $h$ - $s$   
401 relationship,  $\Theta_h = \{\theta_{intercept}, \theta_{rate}\}$ . We use the Poisson likelihood to estimate the combined  
402 vector of parameters  $\{\Theta_{DFE}, \Theta_h\}$ . The likelihood is calculated as  
403

$$404 \quad L(\Theta_{DFE}, \Theta_h | \Theta_D, \theta, X_i) = \prod_{i=1}^{n-1} \frac{E[X_i | \Theta_D, \Theta_{DFE}, \Theta_h, \theta]^{X_i}}{X_i!} e^{-E[X_i | \Theta_D, \Theta_{DFE}, \Theta_h, \theta]} \quad (2)$$

405  
406 Here,  $\Theta_D$  is a vector of demographic parameters,  $X_i$  is the count of SNPs with frequency  $i$  in  
407 the sample (the entries of the SFS),  $\theta$  is the population mutation rate, and  $n$  is the sample size.  
408 We set  $\Theta_D$  to the maximum likelihood estimates of the demographic parameters  $\widehat{\Theta}_D$ , and  $\theta$  to the  
409 nonsynonymous population scaled mutation rate,  $\theta_{NS} = 4N_e\mu L_{NS}$ . We estimated  $\theta_{NS}$  from  $\theta_S$  by  
410 accounting for the difference in synonymous and nonsynonymous sequence length.

411 The expected values of  $X_i$  refer to the expected entries of the SFS given demography and  
412 selection parameters. We used the software *daDi* (27) to compute the expected SFS for a 2-  
413 dimensional grid of 1 million pairs of  $N_e s$  and  $h$  values on grid that is exponential in  $N_e s$  and  
414 linear in  $h$  (see also *Cubic spline interpolation to speed up the computation of cached SFS*). We  
415 vary  $h$  from zero (completely recessive) to one (completely dominant), and  $N_e s$  from  $-N_e$  (i.e.  
416 lethal) to  $-1 \times 10^{-4}$  (effectively neutral). This set of site frequency spectra is then used to calculate  
417 the expected SFS for an arbitrary distribution of  $N_e s$  and  $h$  values. This is done by numerically  
418 integrating over the respective spectra weighted by the gamma distribution. Since we assume one  
419  $N_e s$  value corresponds to a single  $h$  value (equation 1), this is a one-dimensional integration. The  
420 numerical integration was done using the ‘numpy.trapz’ function as implemented in *daDi*.

421 Numerical optimization is used to find the parameters of the DFE and dominance model  
422 that maximize the Poisson likelihood (equation 2). For this optimization step, we use the BFGS  
423 algorithm as implemented in the ‘optimize.fmin\_bfgs’ function of scipy. To avoid finding local  
424 optima, we repeated every estimation approach from 1000 uniformly distributed random starting  
425 parameters. Our approach allows us to estimate the parameters of any arbitrary distribution of  
426  $N_e s$  values and any arbitrary function that relates  $h$  to  $s$  (or  $N_e s$ ).

427 To summarize, our inference of dominance and DFE parameters ( $\Theta_h, \Theta_{DFE}$ ) consists of the  
428 following steps:

- 429
- 430 1. Infer the parameters of a demographic model and the effective (ancestral) population  
431 size for the outcrossing population.
- 432 2. Conditional on the demographic model, compute the expected SFS for a 2D grid of  
433  $h$  and  $N_e s$  values.
- 434 3. Start at a certain vector of dominance and DFE parameters ( $\Theta_h, \Theta_{DFE}$ ). Note that the  
435 DFE here is defined in units of  $s$ , not  $N_e s$ .

- 436 4. Compute the DFE in units of  $N_e s$  by scaling the DFE from step 3 by the respective  
437 ancestral population size.
- 438 5. Compute the  $h$  value for the grid of  $N_e s$  values according to eq. 1 and the parameters  
439  $\Theta_h$ . Then use the 2D lookup table generated in step 2 to find the closest SFS for each  
440 pair of  $h$  and  $N_e s$ . Integrate those SFS after weighting according to the DFE to find  
441 the expected SFS given the DFE and  $h$ - $s$  relationship.
- 442 6. Given the expected and the empirical SFS for the outcrossing population, compute  
443 the log likelihood according to eq. 2.
- 444 7. By repeating steps 3-6, the log likelihood can be calculated for an arbitrary set of  
445 parameters. Maximum likelihood parameters are computed numerically by  
446 maximizing the likelihood using iterative non-linear optimization methods such as  
447 BFGS or Nelder-Mead (36).  
448

449 The ancestral effective population size in step 4 is calculated from the demographic model.  
450 Fitting the demographic model to the synonymous SFS provided an estimate of  $\theta_S = 4N_e\mu L_S$  for  
451 synonymous sites, where  $\mu$  is the neutral per base-pair mutation rate and  $L_S$  is the synonymous  
452 sequence length. Using this formula, we estimated  $N_e$  by setting the neutral mutation rate to  $7 \times$   
453  $10^{-9}$  (37). Note that when partitioning our data into different gene categories and estimating the  
454 selection parameters for each category separately, we also allow for a different ancestral  $N_e$  and  
455 demographic estimates in those categories to control for different levels of background selection  
456 in different genomic regions (38–41).

457 Finally, we can compute the likelihood at the maximum likelihood parameter values for the  
458 three different dominance models (i.e. additive model, constant  $h$  model, and  $h$ - $s$  relationship  
459 model), and compute the likelihood ratio test statistic  $\Lambda$ , which will allow for model comparison.  
460

#### 461 Cubic spline interpolation to speed up the computation of cached SFS

462 Step 2 in our inference method involves computing a lookup table of one million SFS for a  
463 wide range of 1000x1000 pairs of  $N_e s$  and  $h$  values. Although each single computation of a SFS  
464 is relatively fast, it is computationally expensive to compute the total of one million SFS with  
465  $\partial a \partial i$ . We sped up this computation by utilizing the fact that the SFS across close  $N_e s$  and  $h$  values  
466 is fairly smooth. Thus, we only compute the expected SFS for a coarse grid of 50 x 20  $N_e s$  and  $h$   
467 values, and then interpolate the entries of the SFS for a much finer grid of 1000 x 1000  $N_e s$  and  $h$   
468 values. The interpolation is done using the CubicSpline function of the python package  
469 `scipy.interpolate`. Each frequency of the SFS is interpolated separately in a two-step process:  
470 first, each frequency is interpolated for 1000 positions along the  $N_e s$  axis, keeping  $h$  constant,  
471 leading to a grid of 1000 x 20 SFS. Then, each frequency is interpolated along the  $h$  axis,  
472 keeping  $N_e s$  constant, leading to the final grid of 1000 x 1000 SFS. Examples of the cubic spline  
473 interpolation of frequency classes of the SFS along the  $N_e s$  and  $h$  axes demonstrate that the  
474 interpolation works well for a wide range of  $h$ ,  $N_e s$ , and minor allele frequency (MAF) values  
475 (Fig. S5 and S6).  
476

#### 477 Population genetic inference of dominance using data from an outcrossing and a highly inbred 478 population

479 The nonsynonymous SFS for different values of  $h$  can be very similar when modifying the  
480 selection coefficient accordingly (see Fig. 1A). This suggests that the power for estimating  
481 dominance might be small when using only data from a single outcrossing population. This can

482 be seen in Fig. S2A, where simulations with  $h=0.5$  (H0) are compared to simulations with a  
 483 constant  $h$  of 0.46 (H1). Such a small difference in  $h$  leads to a considerable overlap in the  
 484 distribution of the likelihood ratio test statistic  $\Lambda$  between simulations under H0 and H1, and  
 485 there is no power to discriminate those two hypotheses.

486 We propose to increase power for detecting the true dominance model, and improve  
 487 parameter estimation, by combining data from an outcrossing species with data from a selfing  
 488 species. The main factor determining the SFS of the outcrossing species is the difference in  
 489 fitness between the homozygous wild-type and the heterozygous genotype, having fitnesses 1  
 490 and  $1-hs$ , respectively. The difference in fitnesses between these two genotypes affects the SFS  
 491 because deleterious mutations are segregating at low frequencies and thus random mating rarely  
 492 produces homozygous derived genotypes. On the other hand, for a strongly selfing species,  
 493 genotypes mostly are in the homozygous state due to the high level of inbreeding. The main  
 494 factor determining the SFS in the selfing species is the difference in fitness between the two  
 495 homozygous genotypes, having fitnesses 1 and  $1-s$ , respectively. Thus, the data from the  
 496 outcrossing species mainly provides information about the product of  $h$  and  $s$ , whereas the data  
 497 from the selfing species provides information about  $s$  independent of  $h$ . Combining information  
 498 from both datasets therefore should allow us to estimate dominance with higher accuracy than  
 499 either species alone.

500 To extend our inference to an inbreeding/outcrossing pair of populations, we need to  
 501 calculate the likelihood of the parameters given the nonsynonymous SFS of both populations.  
 502 When the two species are strongly diverged such that they do not share ancestral polymorphisms,  
 503 the allele frequencies are independent and the likelihood can be computed as the product of the  
 504 probability of the outcrossing SFS ( $SFS_O$ ) and the probability of the inbreeding SFS ( $SFS_I$ ). In  
 505 terms of log-likelihoods (LL), this equates to:

$$506$$

$$507 \quad LL(\Theta_h, \Theta_{DFE} | SFS_O, SFS_I, \Theta_{D,I}, \theta_I, \Theta_{D,O}, \theta_O) =$$

$$508 \quad LL_O(\Theta_h, \Theta_{DFE} | SFS_O, \Theta_{D,O}, \theta_O) + LL_I(\Theta_h, \Theta_{DFE} | SFS_I, \Theta_{D,I}, \theta_I) \quad (3)$$

$$509$$

510 The first term of the sum, the log likelihood of the selection parameters ( $\Theta_h$  and  $\Theta_{DFE}$ ) given  
 511 the outcrossing SFS, is computed using the approach developed above for the case of a single  
 512 outcrossing population. To calculate the log likelihood for the inbreeding SFS (the second term  
 513 of the right hand side of equation 3), we need to account for the effect of inbreeding on the SFS.  
 514 For strongly inbred species such as *A. thaliana* with a selfing rate of at least 97% (42), we  
 515 assume that the inbreeding coefficient  $F$  is effectively 1. In this case, the diffusion equation  
 516 model reduces to a scaled additive model. This can be derived from the formulas of the mean and  
 517 variance of the change in frequency at an allele frequency  $p$ :  $M(p)$  and  $V(p)$ . In the most general  
 518 case, with arbitrary inbreeding and dominance, these two quantities are (43):

$$519$$

$$520 \quad M(p) = s p (1-p) \{ (1-F) [h + (1-2h) p] + F \} \quad (4a)$$

$$521 \quad V(p) = p (1-p) (1+F) / (2N) \quad (4b)$$

$$522$$

523 In the case of additive mutations in an outcrossing population ( $F=0$ ,  $h=0.5$ ), these quantities  
 524 become:

$$525$$

$$526 \quad M(p) = s p (1-p) / 2 \quad (5a)$$

$$527 \quad V(p) = p (1-p) / (2N) \quad (5b)$$

528 In the case of a highly inbred population with arbitrary dominance ( $F=1$ ), these quantities  
529 become independent of  $h$ :

530  
531 
$$M(p) = s p (1-p) \quad (6a)$$

532 
$$V(p) = p (1-p) / (N) \quad (6b)$$

533  
534 The equations for the case of  $F=1$  (eq. 6a,b) is just a scaled version of the equations for  
535 additive mutations in an outcrossing population (eq. 5a,b), with twice the change in mean allele  
536 frequency (eq. 6a), and twice as much drift (eq. 6b). This allows us to use the framework of  $\partial a \partial i$ ,  
537 developed for outcrossing populations, and apply it to data from highly selfing populations.

538 We need to take into account the effect of inbreeding on  $M(p)$  and  $V(p)$  according to eqs.  
539 6ab. The effective population size that we estimate with  $\partial a \partial i$  based on the synonymous SFS is  
540 already taking into account the effect of inbreeding on  $V(p)$ , since it is the population size that  
541 effectively generates the same amount of drift as the standard Wright-Fisher outcrossing model  
542 assumed by  $\partial a \partial i$  (i.e. eq. 5b). Next, we multiply  $s$  by a factor of 2 to find the effective selection  
543 coefficient  $s_e$ . Finally, we use these effective parameters,  $s_e$  and  $N_e$ , to compute the expected SFS  
544 for the highly selfing population using the framework of  $\partial a \partial i$ .

545 The full inference of a common set of dominance and DFE parameters ( $\Theta_{hs}, \Theta_{DFE}$ ) is similar  
546 to the steps outlined above for a single outcrossing population.

- 547  
548 1. Infer the parameters of a demographic model and the effective (ancestral) population  
549 size for both the inbreeding and the outcrossing populations. This is done  
550 independently for the two populations.
- 551 2. Conditional on the demographic model of the outcrossing population, compute the  
552 expected SFS for a 2D grid of  $h$  and  $N_e s$  values. For the inbreeding population,  
553 compute the expected SFS for a 1D grid of  $N_e s$  values, fixing  $h$  to 0.5.
- 554 3. Start at a certain vector of dominance and DFE parameters ( $\Theta_h, \Theta_{DFE}$ ). Note that the  
555 DFE here is defined in units of  $s$ , not  $N_e s$ .
- 556 4. Compute the DFE in units of  $N_e s$  by scaling the DFE with the respective population  
557 size separately for the inbreeding and the outcrossing population. For a gamma  
558 distributed DFE, this amounts in multiplying the scale parameter by  $N_e$ .
- 559 5. For the inbreeding population, additionally scale the DFE from step 3 by a factor of  
560 2 to derive the effective DFE in units of  $N_e s_e$ .
- 561 6. For the outcrossing population, compute the  $h$  value for the grid of  $N_e s$  values  
562 according to eq. 1 and the parameters  $\Theta_h$ . Then use the 2D lookup table generated in  
563 step 2 to find the closest SFS for each pair of  $h$  and  $N_e s$ . Integrate those SFS after  
564 weighting according to the DFE to find the expected SFS given the DFE and  $h$ - $s$   
565 relationship.
- 566 7. Compute the expected SFS for the inbreeding population by integrating across the  
567 1D lookup table of SFS after weighting each SFS according to the DFE in units of  
568  $N_e s_e$ . Note that  $h$  is fixed to 0.5.
- 569 8. Given the expected and the empirical SFS for both the inbreeding and the  
570 outcrossing populations, compute the log likelihood according to eqs. 2 and 3.
- 571 9. By repeating steps 4-8, the log likelihood can be calculated for an arbitrary set of  
572 parameters. Maximum likelihood parameters are computed numerically by

573 maximizing the likelihood using iterative non-linear optimization methods such as  
574 BFGS or Nelder-Mead (36).

575

#### 576 Bootstrapping and testing model parameters

577 Our maximum likelihood approach of inferring the DFE and dominance parameters only  
578 returns a point estimate, and does not include a measure of the uncertainty of the estimate.  
579 Further, since the approach numerically optimizes the likelihood and estimates demographic  
580 parameters, numerical errors might lead to a larger uncertainty in parameters than expected based  
581 on the shape of the likelihood function. Thus, we follow a non-parametric bootstrapping  
582 approach by Poisson resampling both the synonymous and nonsynonymous empirical SFS and  
583 re-estimating the demographic and selection parameters for each resampling. From 20  
584 bootstrapped parameters we then compute the standard error and the 95% confidence interval  
585 (Fig. 3C). To test for difference in certain parameters between gene categories, we computed a z-  
586 score by dividing the difference in the estimate by the estimated standard error of the difference.  
587 The  $P$ -value is then computed based on the standard normal distribution (Fig. 3D).

588

#### 589 Robustness in establishing the $h$ - $s$ relationship

590 The negative relationship between  $h$  and  $s$ , such that more deleterious mutations are more  
591 recessive, was first reported by a series of mutation accumulation (MA) experiments in  
592 *Drosophila* (10, 11), and later supported by two studies in yeast (13, 19). However, the validity  
593 of the results was questioned (19, 44). Further, the more comprehensive and detailed study in  
594 yeast restricts their  $h$ - $s$  relationship models such that more deleterious mutations are only  
595 allowed to become more recessive than less deleterious mutations, but not more dominant (19).  
596 Such a study, by definition, cannot find support for a positive relationship between  $h$  and  $s$ ,  
597 because the model did not allow for such a relationship. Thus, based on previous work, it has not  
598 clearly been established that more deleterious mutations become more recessive.

599 Therefore, we also tested an alternative model where  $h$  converges to one instead of zero, i.e.  
600 more deleterious mutations are more dominant than less deleterious mutations:

601

$$h = f_{\text{alternative}}(s) = 1 - \frac{1}{\frac{1}{(1 - \theta_{\text{intercept}})} - \theta_{\text{rate}}s}$$

602

603 However, this model does not improve fit to the SFS over a constant  $h$  model or the  $h$ - $s$   
604 relationship model of equation 1. When using only data from *A. lyrata*, then the log likelihood of  
605 the alternative  $h$ - $s$  relationship model (LL = -405.1) is similar to that of the constant  $h$  model (LL  
606 = -404.9), and much lower than the log likelihood of the  $h$ - $s$  relationship model of equation 1  
607 (LL = -218.8). The small estimated  $\theta_{\text{rate}}$  parameter (3,980) suggests that this model is equivalent  
608 to the constant  $h$  model where  $h$  does not change with  $s$ . Similar results are obtained with our  
609 two-population inference, using data from both *A. lyrata* and *A. thaliana*. Again, the log  
610 likelihood of the alternative  $h$ - $s$  relationship model (LL = -885.2) is similar to that of the constant  
611  $h$  model (LL = -885.3), and much lower than the log likelihood of the  $h$ - $s$  relationship model of  
612 equation 1 (LL = -399.7). The extremely small estimated  $\theta_{\text{rate}}$  parameter (0.26) suggests that this  
613 model is equivalent to the constant  $h$  model. Thus, in summary, we conclude that a model where  
614 more deleterious mutations become more dominant does not fit the SFS as well as a model where  
615 more deleterious mutations become more recessive.



## 616 Robustness of inference to model mis-specifications

617 When we make simultaneous use of data from both outcrossing (*A. lyrata*) and inbreeding  
618 (*A. thaliana*) species for inferring dominance, we implicitly make the assumption that the DFE is  
619 the same in both species. However, for highly diverged species such as humans and *Drosophila*,  
620 it was shown recently that the DFE, in units of  $s$ , is significantly different (32). One potential  
621 concern is that differences in the DFE between species could lead to falsely inferring an  $h$ - $s$   
622 relationship when the true model is additivity.

623 However, we found additional support for the of  $h$ - $s$  relationship model. First, we see  
624 significant support for an  $h$ - $s$  relationship over an additive or constant  $h$  model even when basing  
625 our inference only on the outcrossing *A. lyrata* data (Table S2). Further, the estimates of the DFE  
626 and dominance parameter estimates agree reasonably with each other across different ways of  
627 doing the inference. Specifically, estimates made using only *A. lyrata*, agree with those using *A.*  
628 *lyrata* and *A. thaliana* combined, although in the former case, the confidence limits are wider  
629 (Fig. S8). Second, we explored the effect of different DFEs on our inference procedure using  
630 simulations. We ran simulations under an additive model, with parameters of the DFE taken  
631 from separate estimates of the DFE in each species (for details see the next section). Then, on  
632 each simulated dataset, we fit the demographic and selective models. Lastly, we compute the  
633 sum of log likelihoods ( $LL_O + LL_I$ ), assuming a unique additive DFE in both species (true model).  
634 Then we compare this log likelihood to the log likelihood that assumes the same DFE, but an  $h$ - $s$   
635 relationship (incorrect model). We find that the additive log likelihood always sums up to a  
636 larger value than the log likelihood assuming the same DFE, but an  $h$ - $s$  relationship. This pattern  
637 in the simulations contrasts with what is seen in the actual empirical data. For the empirical data,  
638 we find that the log likelihood of the additive model with unique DFEs ( $LL_O + LL_I = -466 - 84 = -$   
639  $550$ ) is smaller (i.e. a worse fit) than the log likelihood assuming the same DFE, but an  $h$ - $s$   
640 relationship ( $LL = -400$ , see Table S3). This suggests that the additive model has a worse fit than  
641 an  $h$ - $s$  relationship model, even when the assumption of an identical DFE in both species is  
642 relaxed. In summary, analyses of simulated data suggest that it is possible to distinguish between  
643 different DFEs between species and a true  $h$ - $s$  relationship. It is unlikely for our inference  
644 framework to infer a spurious  $h$ - $s$  relationship due to differences in the DFE between species.

645 Another assumption of our approach is that the inbreeding coefficient  $F$  of the selfing  
646 population equals 1. We tested robustness to this assumption by simulating SFS data for a selfing  
647 population with selfing rate at the lower end of what has been estimated for *A. thaliana* (97%;  
648 (42, 45–47)). We then compared this SFS to an SFS that is simulated under full selfing ( $F=1$ ),  
649 and found that the SFS match up well. Similar results are found for even lower selfing rates of  
650 90% or 85% (Fig. S9). Moreover, we found that our approach leads to unbiased estimates when  
651 simulating data under a selfing rate of 97% (Fig. S10). Thus, an inbreeding rate of 97% is high  
652 enough to ensure unbiased estimation of dominance parameters with our approach.

653

## 654 Simulation setup

655 To test our inference procedure, we simulated data using the forward simulation software  
656 PReFerSim (48), but changed the source code of the software to allow for an  $h$ - $s$  relationship  
657 according to eq. 1. We simulate genome-wide data under the three-epoch model, with  
658  $\theta_{\text{Synonymous, Inbreeding}}=41,800$ ,  $\theta_{\text{Nonsynonymous, Inbreeding}}=96,600$ ,  $\theta_{\text{Synonymous, Outcrossing}}=131,600$ , and  
659  $\theta_{\text{Nonsynonymous, Outcrossing}}=304,000$ . Here,  $\theta$  is  $4N_e\mu L$ , where  $L$  is the respective synonymous or  
660 nonsynonymous sequence length,  $\mu$  is the neutral mutation rate, and  $N_e$  is the ancestral  
661 population size. Further, we simulated smaller sets of data that reflect the relatively small

662 number of structural genes, with all values of  $\theta$  being 10 times smaller. The simulation  
663 parameters for the DFE, the demographic model, and the  $h$ - $s$  relationship are taken from the  
664 empirical estimates from the genome-wide data (see Table S1 and S3). However, the simulations  
665 are downscaled to a 50-fold smaller population size than estimated to increase the speed of the  
666 simulations (32). After simulating the respective synonymous and nonsynonymous SFS under  
667 both inbreeding and outcrossing, we estimate the demographic parameters, the DFE parameters,  
668 and the dominance parameters using our method.

669 We simulated 100 replicates of the following scenarios: First, we simulated under the  
670 additive model, assuming the same DFE in both populations. After running the inference, this  
671 leads to the null distribution of the test statistic  $\Lambda$  (Fig. 2C and 2D). Second, we simulated under  
672 the constant  $h$  model. This leads to the distribution of  $\Lambda$  under the alternative hypothesis of  
673 constant  $h$  (Fig. 2C). Finally, we simulated under the  $h$ - $s$  relationship model. This leads to the  
674 distribution of  $\Lambda$  under the alternative hypothesis of an  $h$ - $s$  relationship (Fig. 2D). We find that  
675 we can estimate the true parameters of the  $h$ - $s$  relationship under all simulation scenarios (Fig.  
676 S10).

677 The two simulated null distributions of  $\Lambda$  in Fig. 2C and 2D follow closely to the  
678 expectation under the asymptotic theory, with only a slightly larger mean and standard deviation:  
679 the expected mean and standard deviation of a chi-square distribution with  $df=1$  is 1 and 1.9, the  
680 observed mean and standard deviation of  $\Lambda$  in Fig. 2C is 1.9 and 2.9. The expected mean and  
681 standard deviation of a chi-square distribution with  $df=2$  is 2 and 2, the observed mean and  
682 standard deviation of  $\Lambda$  in Fig. 2D is 2.1 and 4.9.

683

#### 684 Model for how the evolution of optimal gene expression explains dominance patterns

685 Our model of how optimal gene expression leads to dominance is an extension of the model  
686 of Hurst and Randerson (9). In this model, dominance is a direct consequence of optimized gene  
687 expression. Fitness is modeled as a function of gene expression. Higher gene expression leads to  
688 higher fitness, but the gain from increasing gene expression is lower for higher levels of gene  
689 expression than for lower levels of gene expression (diminishing returns function). For  
690 enzymatic genes, this relationship was shown to be a consequence of metabolic pathway  
691 dynamics, assuming that the output of the system (flux) is directly related to fitness (7). For  
692 genes encoding structural proteins, it is imaginable that after enough protein is produced to build  
693 certain structures in the cell or the extracellular matrix, additional protein does not improve its  
694 functional role any further.

695 To formalize such a type of diminishing returns function, Hurst and Randerson assume a  
696 simple functional relationship between expression level and fitness,  $f(x) = x/(1+x)$ , where  $x$  is the  
697 expression level (arbitrary units), and  $f$  is the fitness. Further, they assume that per unit of  $x$ , there  
698 is a cost associated with gene expression. In biological systems, these costs could be related to  
699 spending cellular resources (amino acids and nucleotides), allocation of cellular machineries  
700 (RNA polymerase and ribosome), or energy consumption (49). The expression cost is included  
701 as a parameter that quantifies the reduction in fitness per unit of gene expression, such that  $f(x) =$   
702  $x/(1+x)(1-cost*x)$ . For simplicity, we assume that the cost per unit of gene expression is the same  
703 for every gene.

704 We now extend this model in two ways. First, the Hurst and Randerson model assumes that  
705 the fitness at zero expression level is zero. However, experiments in bacteria, yeast and a number  
706 of other organisms have shown that a considerable proportion of genes are non-essential, such  
707 that fitness would not reduce to zero when the gene is not expressed (50). We include an

708 intercept parameter in the model that determines the fitness when the gene is not expressed. An  
709 intercept close to one indicates that the gene is non-essential and can be removed with only little  
710 reduction in fitness, whereas a value close to zero indicates that the gene is essential for survival  
711 or reproduction. Second, we add a scale parameter that allows for varying rates of increase in  
712 fitness with expression level (Fig. S11). We define the scale parameter as the expression level at  
713 which fitness is exactly in the middle between the fitness at zero expression and at infinite  
714 expression (assuming no expression costs). In biological terms, this parameter is related to the  
715 amount of protein needed by the organism to function properly. For structural proteins, many  
716 molecules might be needed to build structures in or out of the cell, which would be reflected in a  
717 large scale parameter. For enzymatic proteins, a single protein can catalyze the same chemical  
718 reaction over and over again, thus only a small amount of molecules might be needed and the  
719 scale parameter would be small. The relation between expression level and fitness is then a  
720 function of cost, intercept, and scale:

$$721 \\ 722 \quad f(x) = \frac{(x + \text{intercept} \times \text{scale})(1 - \text{cost} \times x)}{x + \text{scale}} \quad (7)$$

723  
724 The optimal gene expression under this model can be computed by setting the derivative of  
725  $f(x)$  to zero and solving for (positive)  $x$ :

$$726 \\ 727 \quad x_{opt} = \frac{\sqrt{\text{scale} \times \text{cost} \times (1 - \text{intercept}) \times (1 + \text{scale} \times \text{cost})}}{\text{cost}} - \text{scale} \quad (8)$$

728  
729 We assume that gene regulatory sequence is optimally evolved, such that genes are  
730 expressed at the level  $x_{opt}$  (eq. 8). Next, we investigate the fitness effect of gene mutations that  
731 cause the protein to be non-functional. If the mutation is heterozygous, then the amount of  
732 functional protein is only half of the amount in the wild-type homozygous genotype. If the  
733 mutation is homozygous, then no functional protein is produced. The fitness consequences of  
734 heterozygous mutations are computed by setting gene expression  $x$  to  $x_{opt}/2$  in eq. 7. The fitness  
735 consequences of homozygous mutations are computed by setting  $x = 0$ . The selection  
736 coefficient  $s$  and the dominance coefficient  $h$  are then defined as:

$$737 \\ 738 \quad s = \frac{f(0) - f(x_{opt})}{f(x_{opt})}$$
$$739 \quad h = \frac{f(x_{opt}) - f\left(\frac{x_{opt}}{2}\right)}{f(x_{opt}) - f(0)}$$

740 Both  $s$  and  $h$  are determined by the three parameters:  $cost$ ,  $intercept$ , and  $scale$ . We can  
741 investigate the relationship between  $s$  and  $h$  as a function of these three parameters (Fig. S12).

742 Two predictions of the model can be noted: First, there is a negative relationship between  $h$   
743 and  $s$ . More strongly deleterious mutations are more recessive than less deleterious mutations  
744 (Fig. S12). Note that this is a consequence of selection for optimal gene expression, not because  
745 of direct selection on a dominance modifier. Direct and indirect models of selection for  
746 dominance were criticized by Orr, who has noted that a predominantly haploid organism would  
747 not be able to evolve dominance (20). In at least one such organism, dominance of mutations is

748 observed, arguing against models of selection for dominance (20). However, our model does not  
749 rely on evolution in a diploid organism, since it does not rely on selection happening only in the  
750 diploid state (see also Hurst and Randerson). It is thus in agreement with Orr's finding. Second,  
751 although the model predicts that mutations are recessive, mutations become slightly less  
752 recessive when increasing the scale parameter, i.e. when increasing the optimal expression level  
753 of the gene. This predicts that mutations in genes with high optimal gene expression (many  
754 molecules are needed) would be more additive than genes with low optimal gene expression (few  
755 molecules are needed). This prediction matches our empirical analyses. We found that gene sets  
756 with high expression level and/or high connectivity (i.e. many molecules needed), tend to be  
757 more additive compared to gene sets having low expression level and/or low connectivity (i.e.  
758 only few molecules needed). Further, we found that mutations in genes encoding structural  
759 proteins tend to be more additive than those in genes encoding catalytic proteins (Fig. 3C).

760 For the simulations in Fig. 4B and 4C, we simulated 5000 genes with random *intercept* and  
761 *scale* parameters and computed  $h$  and  $s$  of potential mutations in each gene. The cost parameter  
762 was fixed to 0.001. The *intercept* parameter was sampled from a uniform distribution with values  
763 ranging from 0.9 to 1, reflecting the fact that most new mutations are effectively neutral (35).  
764 The *scale* parameter was sampled from the absolute values of a normal distribution with mean  
765 and standard deviation of 0.1, leading to variation in the levels of optimal gene expression that is  
766 slightly skewed to lower values (i.e. assuming more genes with small optimal gene expression  
767 than with large optimal gene expression).

768

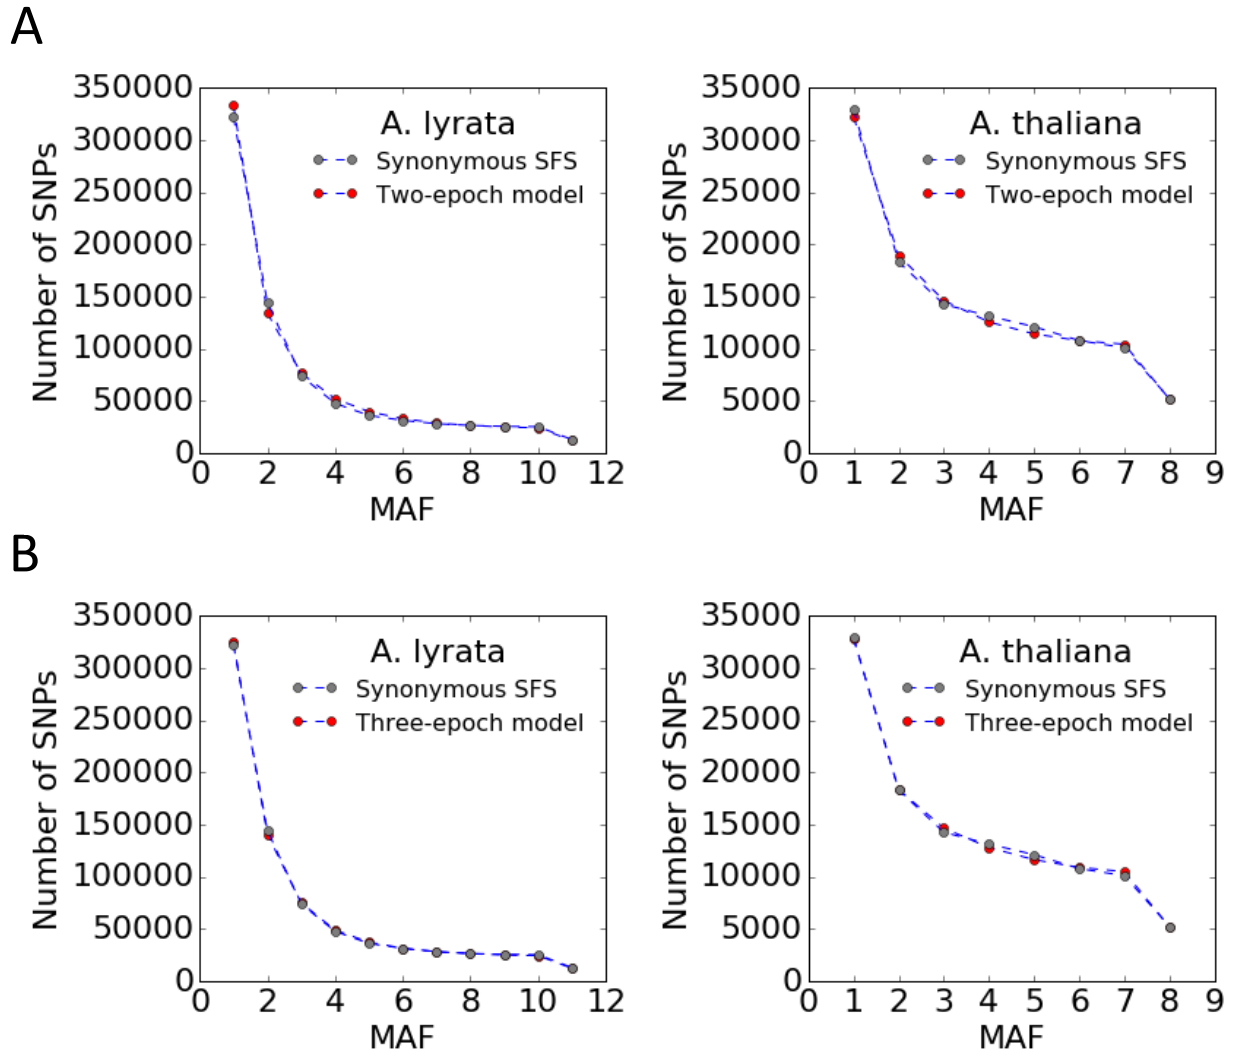

769

770 **Fig. S1. Demographic model fit to the synonymous SFS.**

771 MAF is the minor allele frequency. In both species, the three-epoch model (B) fits singletons and  
772 doubletons better than the two-epoch model (A).

773

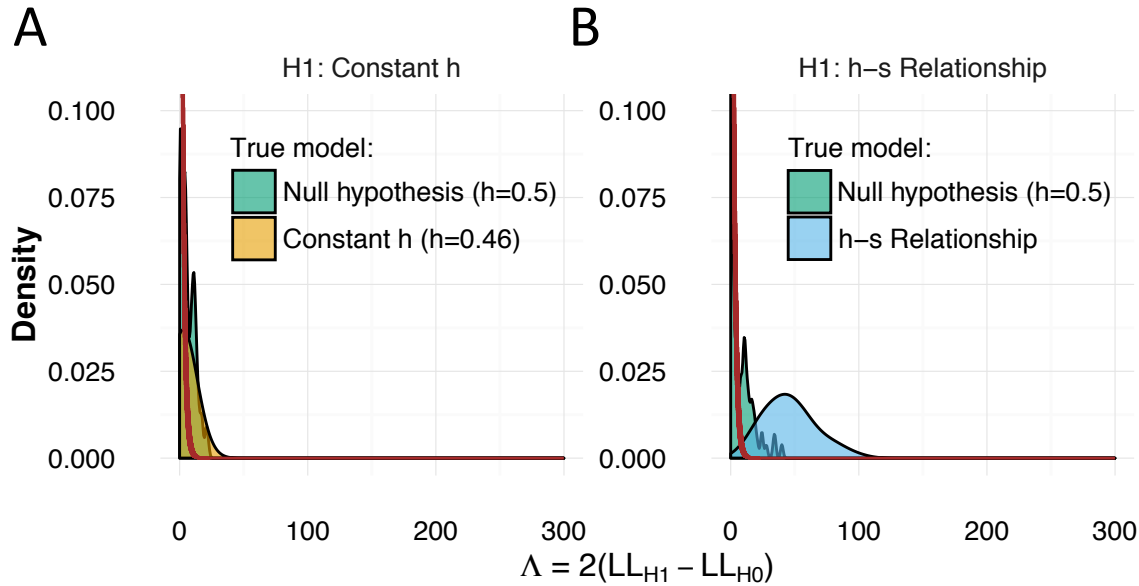

774

775 **Fig. S2. Power for discriminating between dominance models using data from a single**  
776 **outcrossing species (*A. lyrata*).**

777 (A) Likelihood ratio tests comparing a constant  $h$  model to an additive model. When data are  
778 simulated under an additive model (green),  $\Lambda$  nearly follows a chi-square (2  $df$ ) distribution (red  
779 line). When the data are simulated under a model with  $h=0.46$  (tan), the distribution of  $\Lambda$   
780 overlaps considerably, indicating little statistical power. (B) Likelihood ratio tests comparing the  
781  $h$ - $s$  relationship model to an additive model. When data are simulated under an additive model  
782 (green),  $\Lambda$  nearly follows a chi-square (2  $df$ ) distribution (red line). However, when the data are  
783 simulated under the  $h$ - $s$  relationship model (tan), the distribution of  $\Lambda$  is substantially larger,  
784 indicating good statistical power.

785

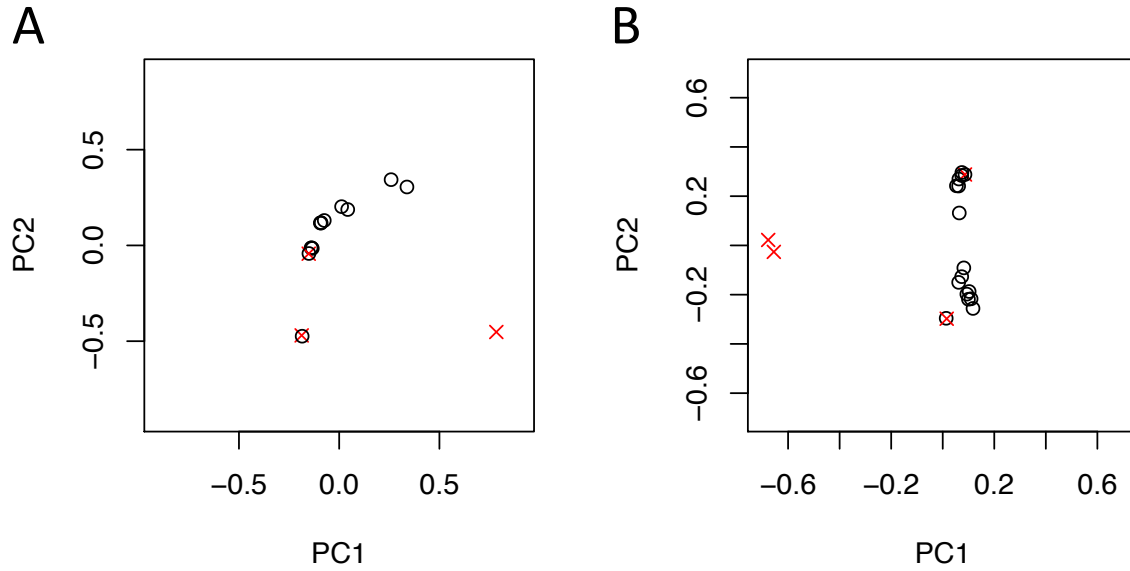

786

787 **Fig. S3. Principal component analysis of population structure.**

788 Principal component analysis (PCA) of the genetic structure of (A) *A. lyrata* and (B) *A. thaliana*.

789 When two accessions were closely related, we retained one individual selected at random. We

790 also removed accessions that are highly diverged from the majority of individuals. The

791 accessions that we removed are indicated by red crosses.

792

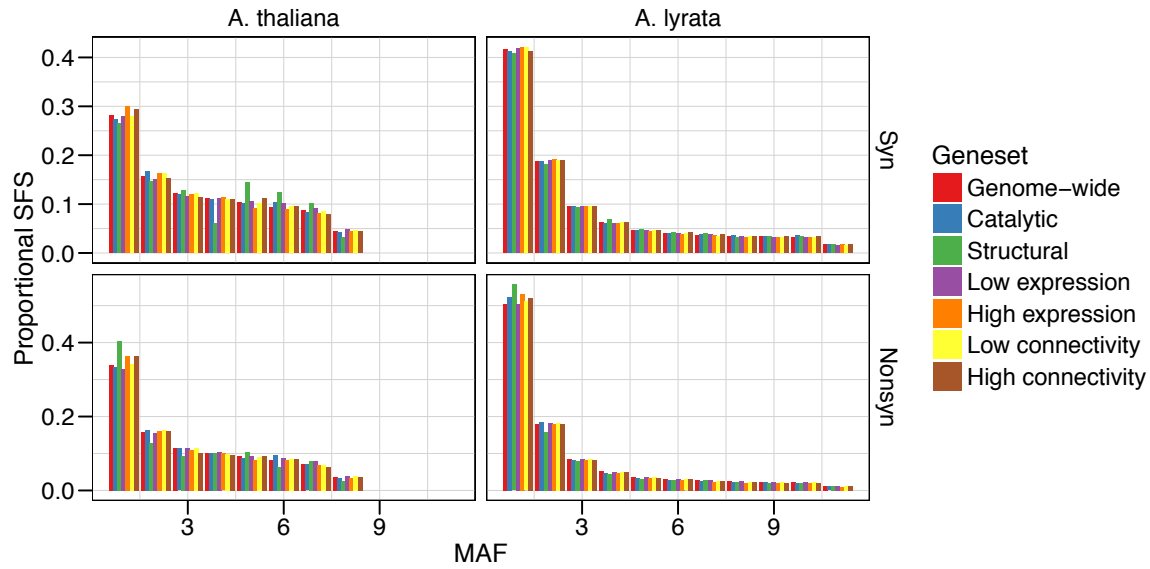

794 **Fig. S4. Folded site frequency spectra (SFS) for different categories of genes.**

795 In both species, structural proteins have the highest proportion of nonsynonymous singletons,  
796 suggesting these genes have experienced a greater effect of purifying selection.

797

798



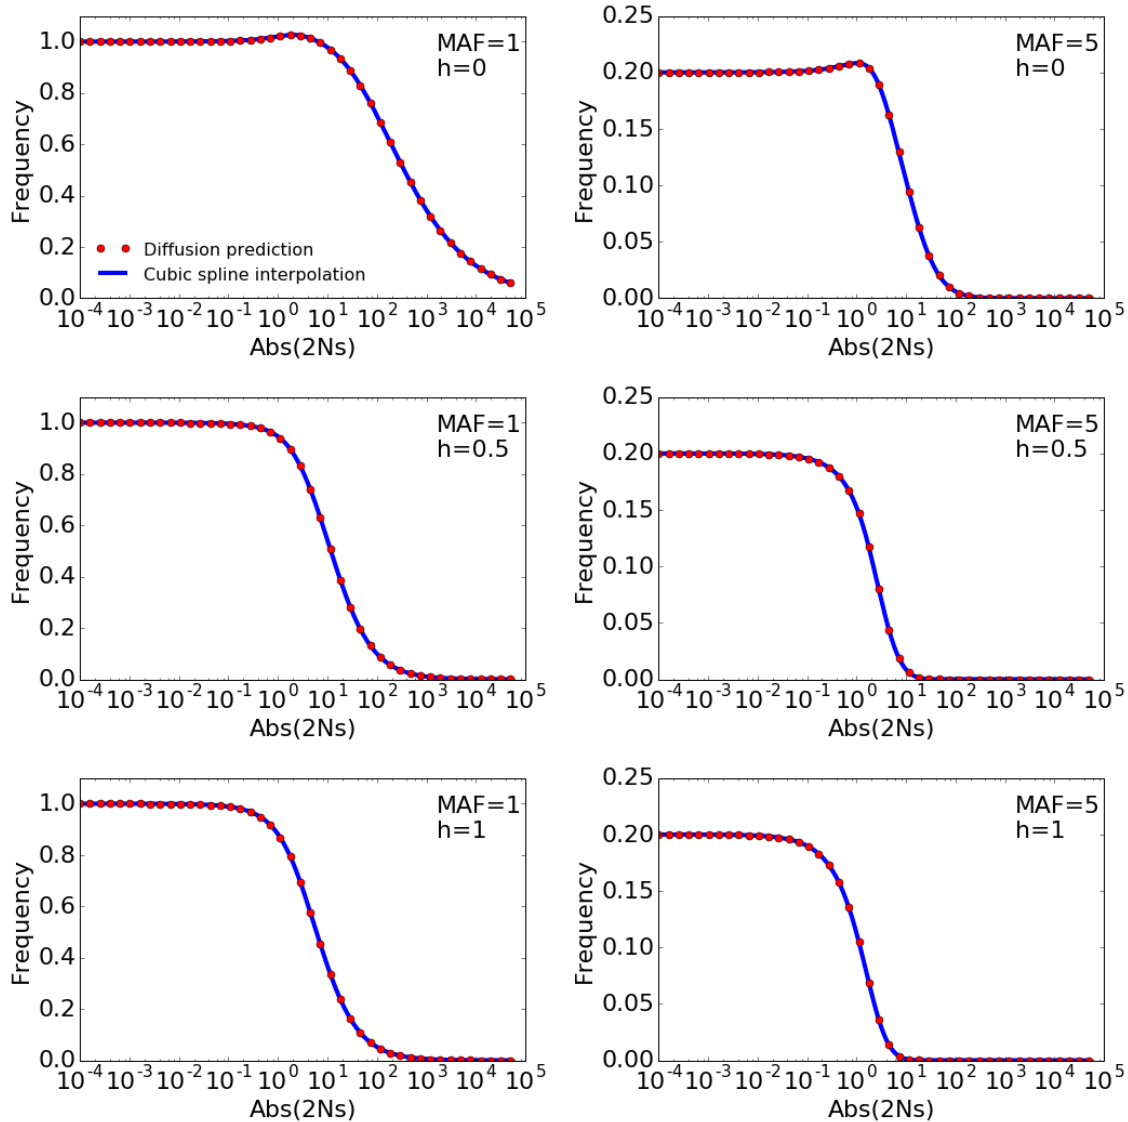

799

800 **Fig. S5. Cubic spline interpolation of the SFS along the  $N_e s$  axis**

801 Examples of cubic spline interpolation of two entries of the SFS (MAF=1 and MAF=5) for  $h=0$ ,  
802  $h=0.5$ , and  $h=1$ . The blue line is the cubic spline interpolation to the red points, which indicate  
803 the expected values under the diffusion approximation as predicted by  $\partial a \partial i$ . The demography is  
804 assumed to be a constant size model. In all cases, the interpolation line fits well to the red points.

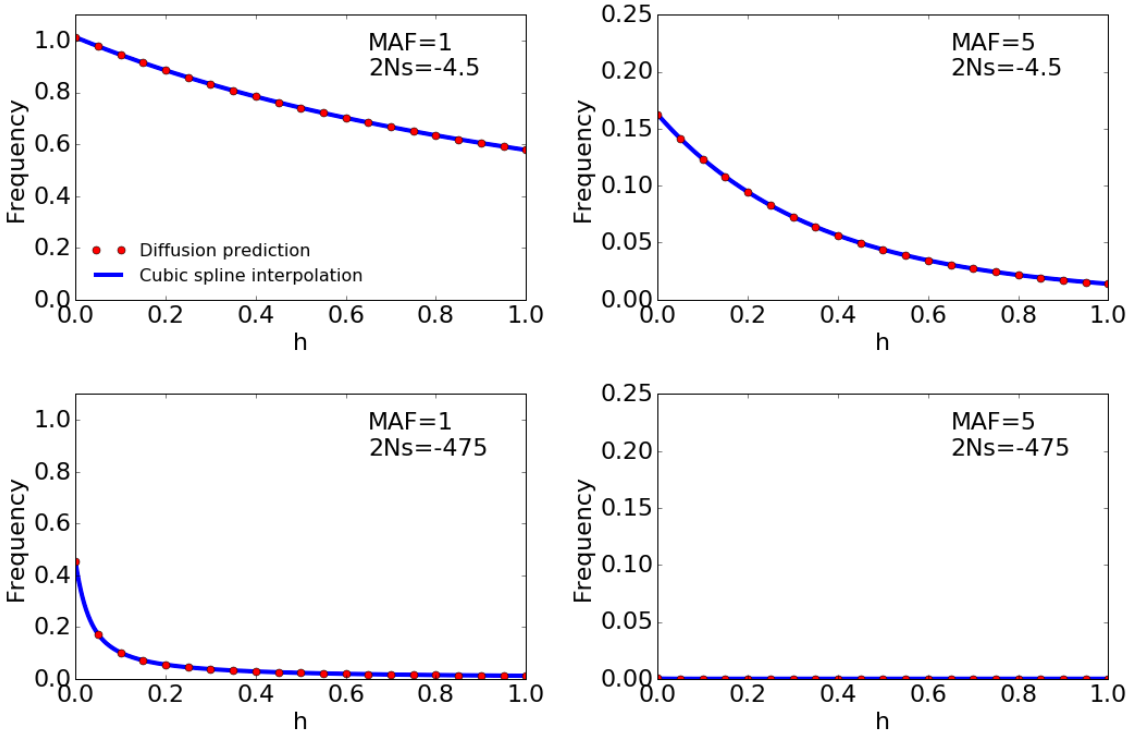

805

806 **Fig. S6. Cubic spline interpolation of the SFS along the  $h$  axis**

807 Examples of cubic spline interpolation of two entries of the SFS (MAF=1 and MAF=5) for  
808 slightly deleterious ( $2N_s=-4.5$ ) and strongly deleterious ( $2N_s=-475$ ) mutations. The blue line is  
809 the cubic spline interpolation to the red points, which indicate the expected values under the  
810 diffusion approximation as predicted by  $\partial a \partial i$ . The demography is assumed to be a constant size  
811 model. In all cases, the interpolation line fits well to the red points.

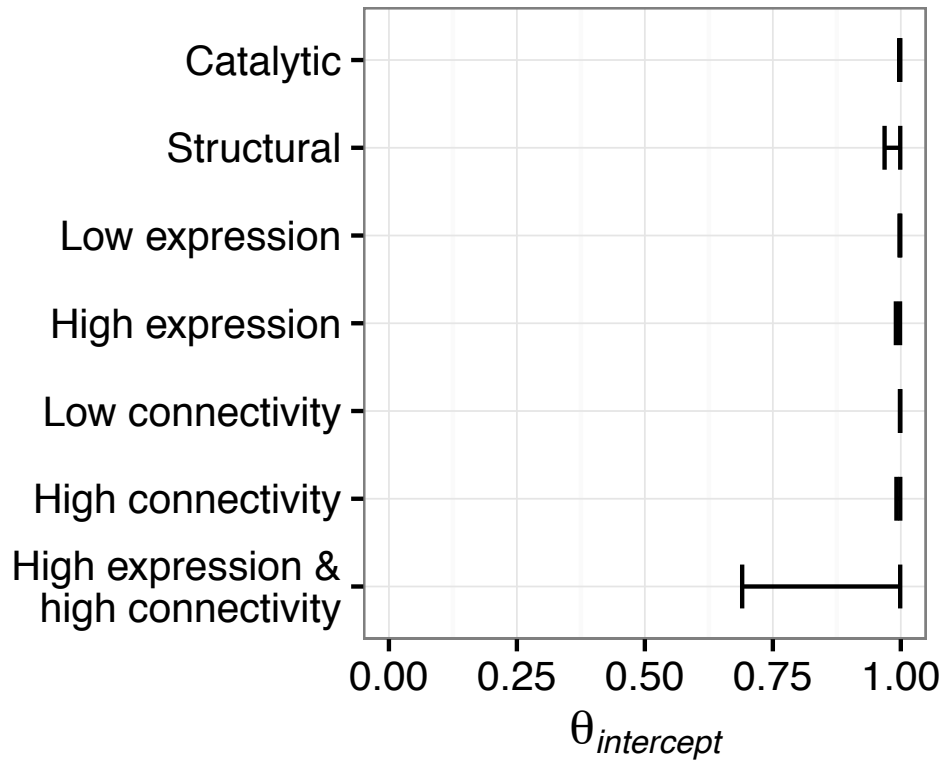

812

813 **Fig. S7. Estimation of the intercept parameter of the  $h$ - $s$  relationship.**

814 Confidence interval (95%) for the estimate of  $\theta_{intercept}$  for different gene categories, combining  
815 data from *A. lyrata* and *A. thaliana* for estimation. Note that the confidence intervals for  $\theta_{intercept}$   
816 for different categories of genes overlap each other suggesting no difference in this parameter.

817

818

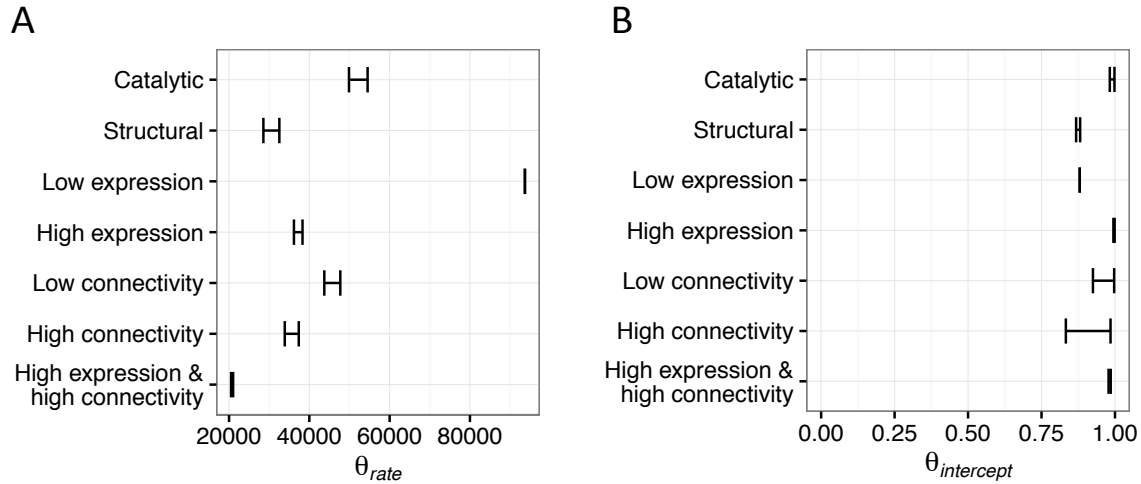

819

820 **Fig. S8. Estimation of the intercept and rate parameter of the  $h$ - $s$  relationship.**

821 Confidence interval (95%) for the estimate of  $\theta_{rate}$  (A), and  $\theta_{intercept}$  (B), for different gene  
822 categories using only data from *A. lyrata* for estimation. Similar to Fig. 3C, the structural genes  
823 as well as the high expression & high connectivity genes show the smallest  $\theta_{rate}$  estimate,  
824 whereas catalytic genes, low expression genes, and low connectivity genes show the highest  $\theta_{rate}$   
825 estimate. However, the confidence intervals are in general larger and more variable between  
826 gene sets than when estimating the parameters using both *A. lyrata* and *A. thaliana* (Fig. 3C).

827

828

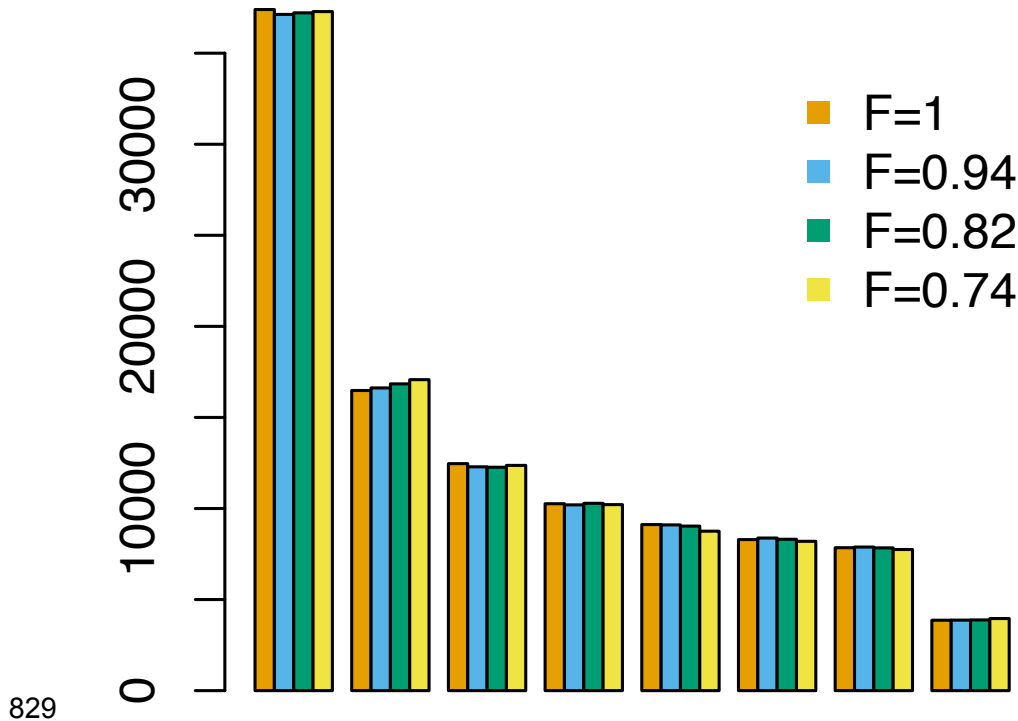

830 **Fig. S9. Prediction of the nonsynonymous SFS under full selfing and partial selfing.**  
831 Forward simulations of the nonsynonymous SFS for *A. thaliana*, assuming either full selfing  
832 ( $F=1$ ) or partial selfing with rates of 97% ( $F=0.94$ ), 90% ( $F=0.82$ ), or 85% ( $F=0.74$ ). All four  
833 SFS agree well, suggesting that selfing in *A. thaliana* can be modeled by assuming an inbreeding  
834 coefficient of one. The simulations assume a three-epoch demographic model with parameters  
835 from Table S1. An  $h-s$  relationship and a gamma DFE is assumed with parameters according to  
836 the genome-wide estimates using both *A. lyrata* and *A. thaliana* (Table S3).  
837  
838

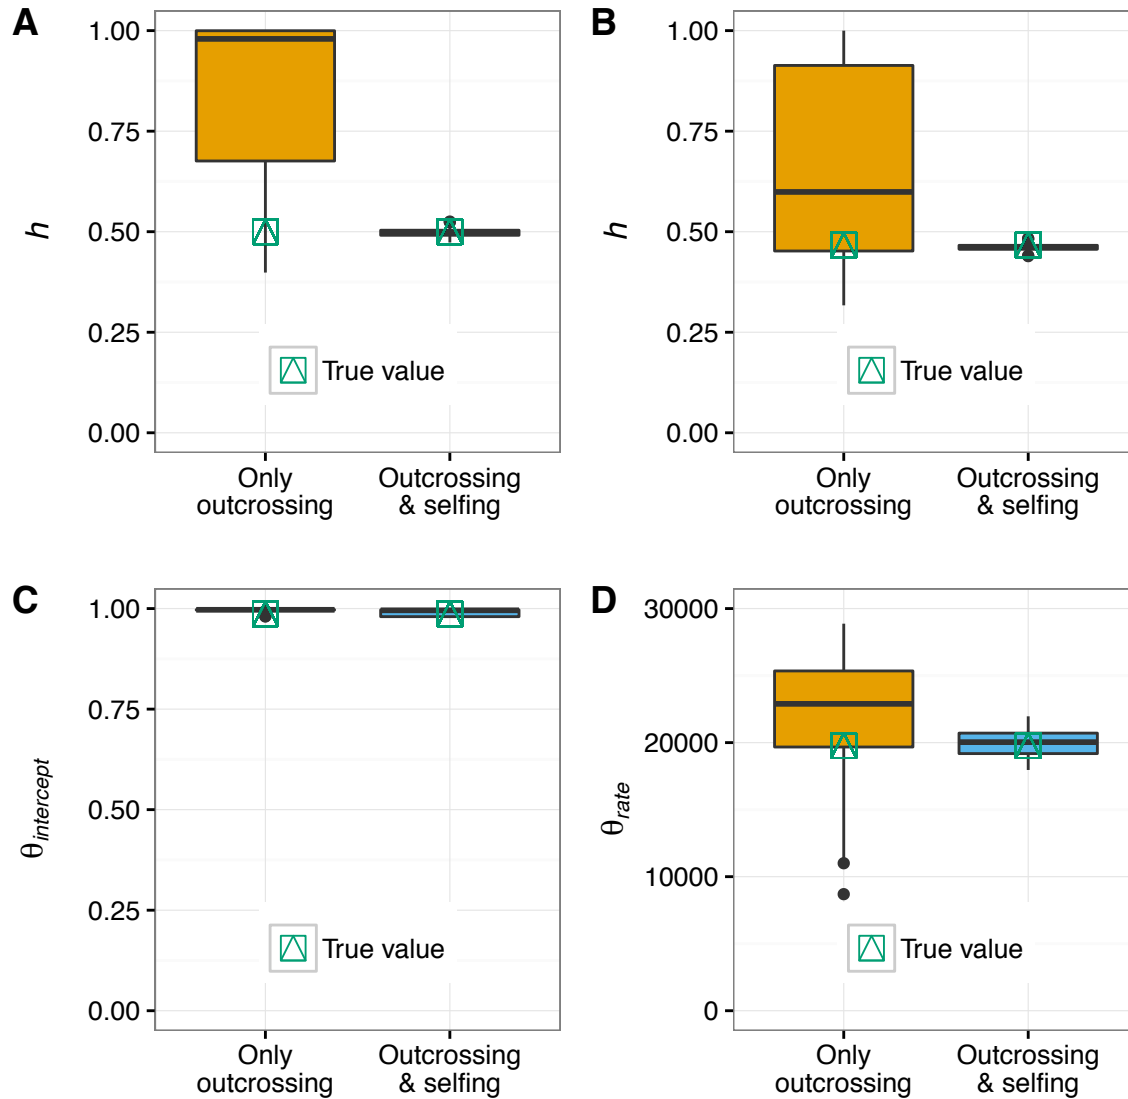

839

840 **Fig. S10. Testing the inference of dominance parameters with simulations.**

841 Data are simulated under (A) an additive model ( $h=0.5$ ), (B) a constant  $h$  model ( $h=0.46$ ), and  
842 (C, D) a  $h-s$  relationship model ( $\theta_{rate}=19773$ ,  $\theta_{intercept}=0.986$ ). True parameter values are indicated  
843 in green and MLEs from 100 replicates are shown as boxplots. Including the selfing species in  
844 the inference considerably improves estimation of the dominance parameters.

845

846

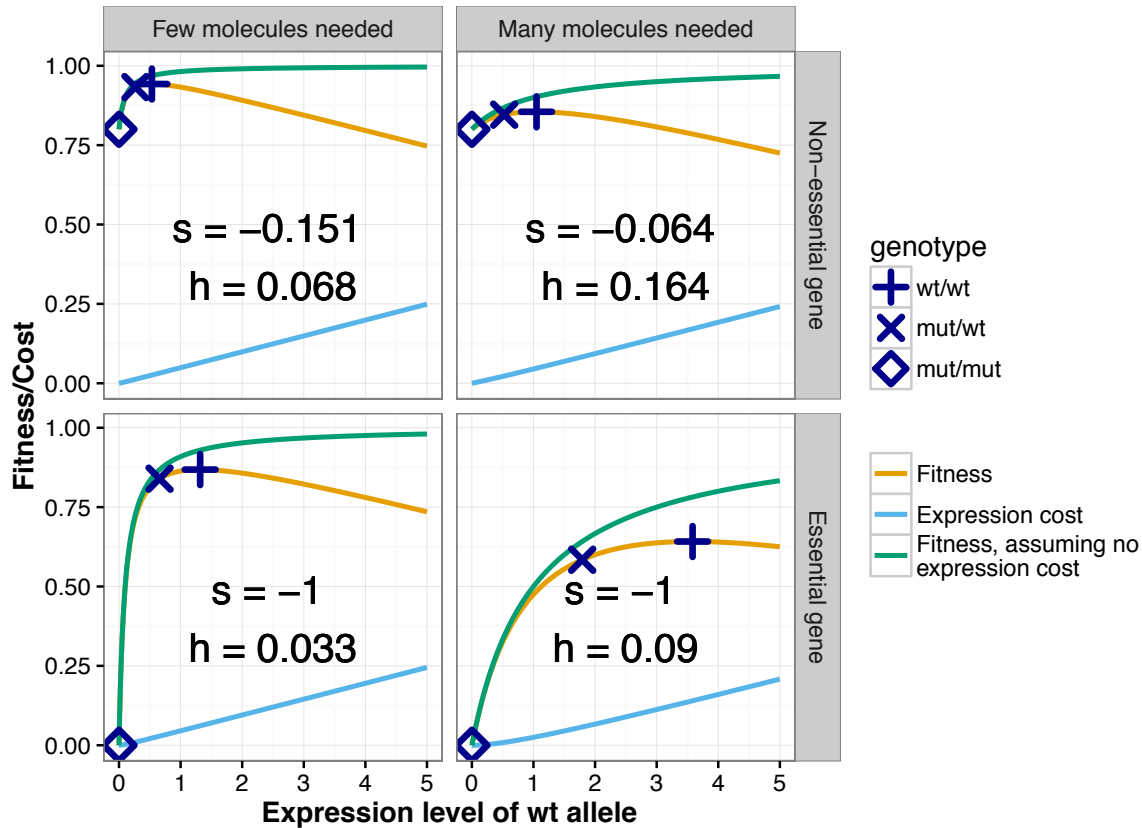

847

848 **Fig. S11. Gene expression model for the evolution of dominance.**

849 Examples of the computation of selection coefficient ( $s$ ) and dominance coefficient ( $h$ ) under our  
 850 gene expression model for the evolution of dominance. The expression level of the homozygous  
 851 wild type genotype (wt/wt) maximizes fitness after taking expression cost into account. The  
 852 expression level of the gene is zero when the mutant is homozygous (mt/mt), and is half the  
 853 optimal expression level when the mutant is heterozygous (wt/mt). The corresponding fitness  
 854 values allow computation of  $s$  and  $h$  (see SI text). For non-essential genes,  $s$  and  $h$  are negatively  
 855 related, i.e. the more deleterious mutation has a smaller  $h$  value. For mutations in essential genes,  
 856 the gene with the higher optimal expression level has a larger  $h$  value than the gene with the  
 857 lower optimal expression level.

858

859

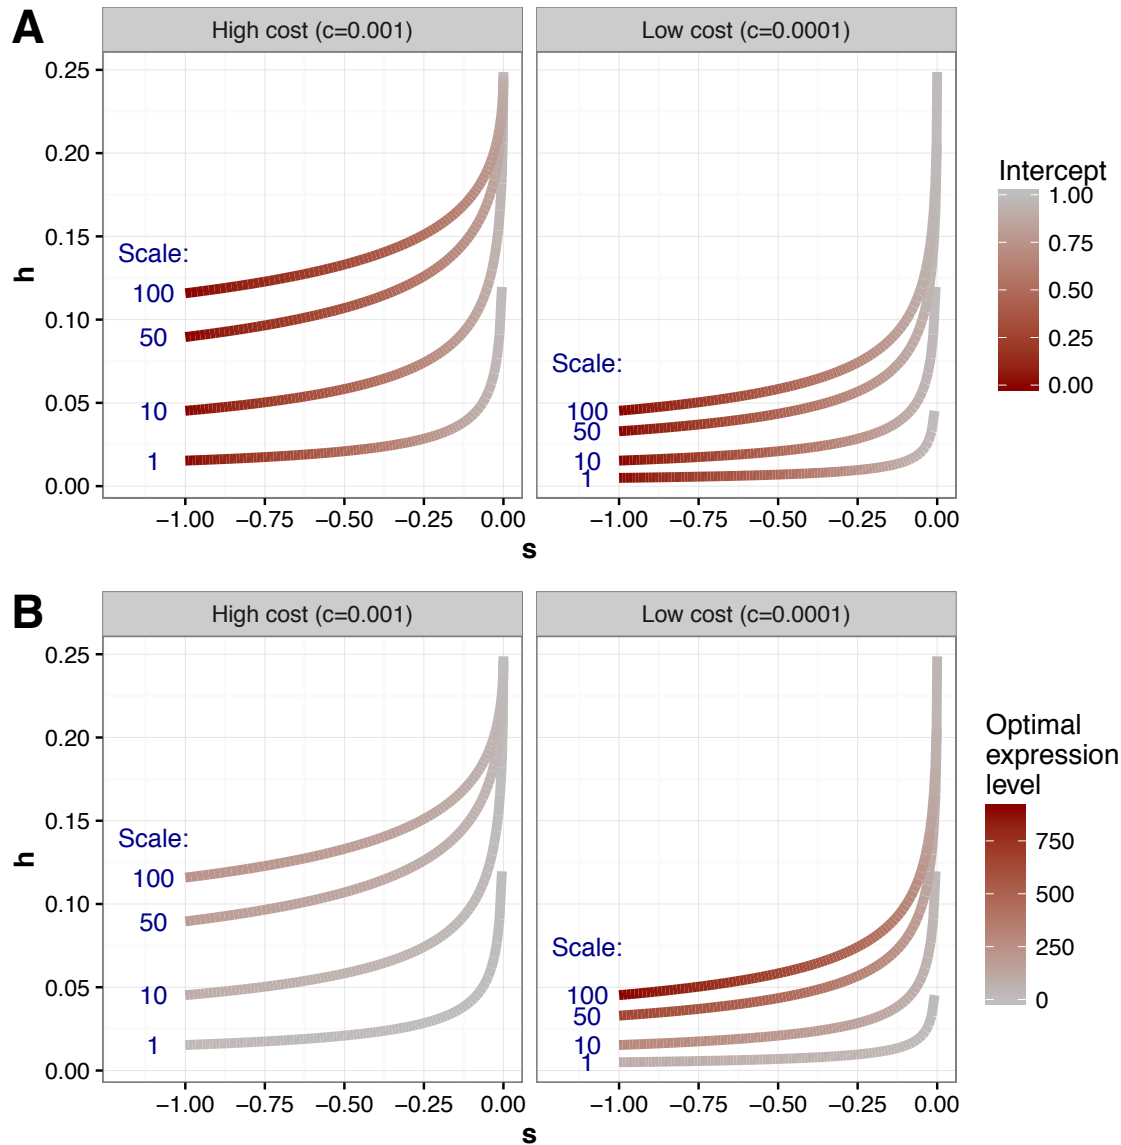

860

861 **Fig. S12. Relationship between  $h$  and  $s$  under our gene expression model for the evolution**  
862 **of dominance.**

863 The intercept in the model is varied continuously from 0 to 1, the scale parameter is set to 1, 10,  
864 50, or 100, and the cost of gene expression per expression unit is set to 0.001, or 0.0001. In (A),  
865 the color scheme indicates different values of the intercept, in (B) it indicates different optimal  
866 expression levels ( $x_{opt}$ ).

867

868



869 **Table S1. Demographic parameter estimates.**

870 Demographic parameter estimates for the two-epoch and the three-epoch model for *A. lyrata* and  
871 *A. thaliana*. The effective population size is indicated as  $N_e$ , LL is the log-likelihood, and T is the  
872 time length of the epoch in generations.

873

| Model       | Species  | $N_{e,ancestral}$ | $N_{e,second\ epoch}$ | $N_{e,third\ epoch}$ | T(second epoch) | T(third epoch) | Synonymous theta | LL    |
|-------------|----------|-------------------|-----------------------|----------------------|-----------------|----------------|------------------|-------|
| Two-epoch   | Lyrata   | 530,895           | 1,797,556             | -                    | 562,612         | -              | 129,058          | -1095 |
|             | Thaliana | 746,148           | 100,218               | -                    | 568,344         | -              | 199,771          | -104  |
| Three-epoch | Lyrata   | 608,570           | 6,554,858             | 23,584               | 462,952         | 1,489          | 131,613          | -218  |
|             | Thaliana | 161,744           | 24,076                | 203,077              | 7,420           | 14,534         | 41,795           | -73   |

874  
875

876 **Table S2. Model comparison of dominance models.**

877 Likelihood ratio test statistics ( $\Lambda$ ) and  $P$ -values when comparing different models of dominance,  
878 using only data from *A. lyrata*. The  $h$ - $s$  relationship fits the data significantly better than the  
879 additive model and significantly better than a model with a single dominance coefficient.

880

| H0                       | H1                        | $\Lambda$ | P-value              |
|--------------------------|---------------------------|-----------|----------------------|
| Additive                 | Constant<br>$h \neq 0.5$  | 123       | $<1 \times 10^{-15}$ |
| Additive                 | $h$ - $s$<br>relationship | 495       | $<1 \times 10^{-15}$ |
| Constant<br>$h \neq 0.5$ | $h$ - $s$<br>relationship | 372       | $<1 \times 10^{-15}$ |

881  
882

883 **Table S3. Maximum likelihood estimates of DFE and dominance parameters**

884 Estimates for the gamma DFE parameters (shape, scale) and the two parameters of the  $h$ - $s$   
 885 relationship ( $\theta_{intercept}$ ,  $\theta_{rate}$ ) for different sets of genes (Genome-wide, catalytic and structural).  
 886

| Gene set         | Data                                    | Inference model  | Shape   | Scale   | $\theta_{intercept}$ | $\theta_{rate}$ | LL   |
|------------------|-----------------------------------------|------------------|---------|---------|----------------------|-----------------|------|
| Genome-wide      | Only <i>A. lyrata</i>                   | Additive         | 0.270   | 0.00042 | 0.5 (fixed)          | 0 (fixed)       | -466 |
|                  |                                         | Constant h       | 0.292   | 0.00016 | 0.998                | 0 (fixed)       | -405 |
|                  |                                         | h-s relationship | 0.159   | 0.00911 | 0.999                | 52085           | -219 |
|                  | Only <i>A. thaliana</i>                 | Additive         | 0.155   | 0.00612 | 0.5 (fixed)          | 0 (fixed)       | -84  |
|                  | <i>A. lyrata</i> and <i>A. thaliana</i> | Additive         | 0.245   | 0.00064 | 0.5 (fixed)          | 0 (fixed)       | -903 |
|                  |                                         | Constant h       | 0.245   | 0.00068 | 0.467                | 0 (fixed)       | -885 |
| h-s relationship |                                         | 0.185            | 0.00263 | 0.987   | 39547                | -400            |      |
| Catalytic        | Only <i>A. lyrata</i>                   | Additive         | 0.398   | 0.00017 | 0.5 (fixed)          | 0 (fixed)       | -105 |
|                  |                                         | Constant h       | 0.436   | 0.00007 | 0.992                | 0 (fixed)       | -99  |
|                  |                                         | h-s relationship | 0.200   | 0.00711 | 0.988                | 50736           | -74  |
|                  | Only <i>A. thaliana</i>                 | Additive         | 0.158   | 0.01326 | 0.5 (fixed)          | 0 (fixed)       | -68  |
|                  | <i>A. lyrata</i> and <i>A. thaliana</i> | Additive         | 0.303   | 0.00048 | 0.5 (fixed)          | 0 (fixed)       | -332 |
|                  |                                         | Constant h       | 0.307   | 0.00051 | 0.427                | 0 (fixed)       | -322 |
| h-s relationship |                                         | 0.236            | 0.00167 | 1.000   | 46618                | -203            |      |
| Structural       | Only <i>A. lyrata</i>                   | Additive         | 0.407   | 0.00062 | 0.5 (fixed)          | 0 (fixed)       | -50  |
|                  |                                         | Constant h       | 0.442   | 0.00023 | 0.997                | 0 (fixed)       | -48  |
|                  |                                         | h-s relationship | 0.268   | 0.00774 | 0.872                | 30106           | -43  |
|                  | Only <i>A. thaliana</i>                 | Additive         | 0.272   | 0.00255 | 0.5 (fixed)          | 0 (fixed)       | -31  |
|                  | <i>A. lyrata</i> and <i>A. thaliana</i> | Additive         | 0.375   | 0.00082 | 0.5 (fixed)          | 0 (fixed)       | -90  |
|                  |                                         | Constant h       | 0.369   | 0.00065 | 0.763                | 0 (fixed)       | -85  |
| h-s relationship |                                         | 0.331            | 0.00119 | 0.996   | 18309                | -80             |      |

887  
 888

889 **Table S4. Maximum likelihood estimates of DFE and dominance parameters for different**  
 890 **expression levels and connectivity**

891 Estimates for the gamma DFE parameters (shape, scale) and the two parameters of the  $h$ - $s$   
 892 relationship ( $\theta_{intercept}$ ,  $\theta_{rate}$ ) for different sets of genes (low and high expression level, and low and  
 893 high connectivity).  
 894

| Gene set               | Data                                    | Inference model        | Shape   | Scale   | $\theta_{intercept}$ | $\theta_{rate}$ | LL   |
|------------------------|-----------------------------------------|------------------------|---------|---------|----------------------|-----------------|------|
| Low expression         | Only <i>A. lyrata</i>                   | Additive               | 0.299   | 0.00020 | 0.5 (fixed)          | 0 (fixed)       | -141 |
|                        |                                         | Constant h             | 0.327   | 0.00008 | 0.982                | 0 (fixed)       | -134 |
|                        |                                         | $h$ - $s$ relationship | 0.122   | 0.08521 | 0.880                | 93694           | -97  |
|                        | Only <i>A. thaliana</i>                 | Additive               | 0.132   | 0.00374 | 0.5 (fixed)          | 0 (fixed)       | -63  |
|                        | <i>A. lyrata</i> and <i>A. thaliana</i> | Additive               | 0.258   | 0.00030 | 0.5 (fixed)          | 0 (fixed)       | -514 |
|                        |                                         | Constant h             | 0.242   | 0.00027 | 0.864                | 0 (fixed)       | -369 |
| $h$ - $s$ relationship |                                         | 0.236                  | 0.00034 | 0.997   | 35966                | -328            |      |
| High expression        | Only <i>A. lyrata</i>                   | Additive               | 0.381   | 0.00033 | 0.5 (fixed)          | 0 (fixed)       | -244 |
|                        |                                         | Constant h             | 0.423   | 0.00012 | 0.997                | 0 (fixed)       | -228 |
|                        |                                         | $h$ - $s$ relationship | 0.212   | 0.00931 | 0.999                | 36169           | -177 |
|                        | Only <i>A. thaliana</i>                 | Additive               | 0.186   | 0.01944 | 0.5 (fixed)          | 0 (fixed)       | -62  |
|                        | <i>A. lyrata</i> and <i>A. thaliana</i> | Additive               | 0.265   | 0.00183 | 0.5 (fixed)          | 0 (fixed)       | -756 |
|                        |                                         | Constant h             | 0.281   | 0.00211 | 0.268                | 0 (fixed)       | -540 |
| $h$ - $s$ relationship |                                         | 0.200                  | 0.01356 | 0.990   | 33765                | -264            |      |
| Low connectivity       | Only <i>A. lyrata</i>                   | Additive               | 0.317   | 0.00030 | 0.5 (fixed)          | 0 (fixed)       | -151 |
|                        |                                         | Constant h             | 0.349   | 0.00011 | 0.993                | 0 (fixed)       | -143 |
|                        |                                         | $h$ - $s$ relationship | 0.177   | 0.00819 | 0.967                | 44449           | -106 |
|                        | Only <i>A. thaliana</i>                 | Additive               | 0.164   | 0.00508 | 0.5 (fixed)          | 0 (fixed)       | -57  |
|                        | <i>A. lyrata</i> and <i>A. thaliana</i> | Additive               | 0.270   | 0.00056 | 0.5 (fixed)          | 0 (fixed)       | -320 |
|                        |                                         | Constant h             | 0.268   | 0.00054 | 0.545                | 0 (fixed)       | -316 |
| $h$ - $s$ relationship |                                         | 0.222                  | 0.00118 | 0.998   | 36278                | -226            |      |
| High connectivity      | Only <i>A. lyrata</i>                   | Additive               | 0.361   | 0.00040 | 0.5 (fixed)          | 0 (fixed)       | -151 |
|                        |                                         | Constant h             | 0.394   | 0.00015 | 0.999                | 0 (fixed)       | -142 |
|                        |                                         | $h$ - $s$ relationship | 0.217   | 0.00794 | 0.850                | 35996           | -104 |
|                        | Only <i>A. thaliana</i>                 | Additive               | 0.171   | 0.01507 | 0.5 (fixed)          | 0 (fixed)       | -101 |
|                        | <i>A. lyrata</i> and <i>A. thaliana</i> | Additive               | 0.295   | 0.00093 | 0.5 (fixed)          | 0 (fixed)       | -433 |
|                        |                                         | Constant h             | 0.294   | 0.00095 | 0.504                | 0 (fixed)       | -433 |
| $h$ - $s$ relationship |                                         | 0.235                  | 0.00290 | 0.991   | 28801                | -288            |      |

895  
 896  
 897  
 898

## 899 References

900

901 22. P. Lamesch *et al.*, The *Arabidopsis* Information Resource (TAIR): improved gene  
902 annotation and new tools. *Nucleic Acids Res.* **40**, D1202–D1210 (2012).

903 23. T. T. Hu *et al.*, The *Arabidopsis lyrata* genome sequence and the basis of rapid genome size  
904 change. *Nat. Genet.* **43**, 476–481 (2011).

905 24. H. Li, Aligning sequence reads, clone sequences and assembly contigs with BWA-MEM.  
906 *ArXiv13033997 Q-Bio* (2013) (available at <http://arxiv.org/abs/1303.3997>).

907 25. M. A. DePristo *et al.*, A framework for variation discovery and genotyping using next-  
908 generation DNA sequencing data. *Nat. Genet.* **43**, 491–498 (2011).

909 26. P. Cingolani *et al.*, A program for annotating and predicting the effects of single nucleotide  
910 polymorphisms, SnpEff: SNPs in the genome of *Drosophila melanogaster* strain w1118;  
911 iso-2; iso-3. *Fly (Austin)*. **6**, 80–92 (2012).

912 27. R. N. Gutenkunst, R. D. Hernandez, S. H. Williamson, C. D. Bustamante, Inferring the joint  
913 demographic history of multiple populations from multidimensional SNP frequency data.  
914 *PLOS Genet.* **5**, e1000695 (2009).

915 28. X. Zheng *et al.*, A high-performance computing toolset for relatedness and principal  
916 component analysis of SNP data. *Bioinformatics.* **28**, 3326–3328 (2012).

917 29. D. Szklarczyk *et al.*, The STRING database in 2017: quality-controlled protein–protein  
918 association networks, made broadly accessible. *Nucleic Acids Res.* **45**, D362–D368 (2017).

919 30. T. Kawakatsu *et al.*, Epigenomic diversity in a global collection of *Arabidopsis thaliana*  
920 accessions. *Cell*. **166**, 492–505 (2016).

921 31. F. H. Shaw, C. J. Geyer, R. G. Shaw, A comprehensive model of mutations affecting fitness  
922 and inferences for *Arabidopsis thaliana*. *Evolution*. **56**, 453–463 (2002).

923 32. C. D. Huber, B. Y. Kim, C. D. Marsden, K. E. Lohmueller, Determining the factors driving  
924 selective effects of new nonsynonymous mutations. *Proc. Natl. Acad. Sci.* **114**, 4465–4470  
925 (2017).

926 33. T. I. Gossman, P. D. Keightley, A. Eyre-Walker, The effect of variation in the effective  
927 population size on the rate of adaptive molecular evolution in eukaryotes. *Genome Biol.*  
928 *Evol.* **4**, 658–667 (2012).

929 34. S. H. Williamson *et al.*, Simultaneous inference of selection and population growth from  
930 patterns of variation in the human genome. *Proc. Natl. Acad. Sci. U. S. A.* **102**, 7882–7887  
931 (2005).

- 932 35. B. Y. Kim, C. D. Huber, K. E. Lohmueller, Inference of the distribution of selection  
933 coefficients for new nonsynonymous mutations using large samples. *Genetics*, Early  
934 online March 1, 2017; <https://doi.org/10.1534/genetics.116.197145> (2017).
- 935 36. Numerical recipes art scientific computing 3rd edition | Numerical recipes. *Camb. Univ.*  
936 *Press*.
- 937 37. S. Ossowski *et al.*, The rate and molecular spectrum of spontaneous mutations in  
938 *Arabidopsis thaliana*. *Science*. **327**, 92–94 (2010).
- 939 38. C. D. Huber, M. DeGiorgio, I. Hellmann, R. Nielsen, Detecting recent selective sweeps  
940 while controlling for mutation rate and background selection. *Mol. Ecol.* **25**, 142–156  
941 (2016).
- 942 39. K. E. Lohmueller *et al.*, Natural selection affects multiple aspects of genetic variation at  
943 putatively neutral sites across the human genome. *PLoS Genet.* **7**, e1002326 (2011).
- 944 40. D. Enard, P. W. Messer, D. A. Petrov, Genome-wide signals of positive selection in human  
945 evolution. *Genome Res.* **24**, 885–895 (2014).
- 946 41. R. D. Hernandez *et al.*, Classic selective sweeps were rare in recent human evolution.  
947 *Science*. **331**, 920–924 (2011).
- 948 42. A. Platt *et al.*, The scale of population structure in *Arabidopsis thaliana*. *PLOS Genet.* **6**,  
949 e1000843 (2010).
- 950 43. S. Glémin, Mating systems and the efficacy of selection at the molecular level. *Genetics*.  
951 **177**, 905–916 (2007).
- 952 44. A. García-Dorado, A. Caballero, On the average coefficient of dominance of deleterious  
953 spontaneous mutations. *Genetics*. **155**, 1991–2001 (2000).
- 954 45. R. J. Abbott, M. F. Gomes, Population genetic structure and outcrossing rate of *Arabidopsis*  
955 *thaliana* (L.) Heynh. *Heredity*. **62**, 411–418 (1989).
- 956 46. J. Bergelson, E. Stahl, S. Dudek, M. Kreitman, Genetic variation within and among  
957 populations of *Arabidopsis thaliana*. *Genetics*. **148**, 1311–1323 (1998).
- 958 47. F. X. Picó, B. Méndez-Vigo, J. M. Martínez-Zapater, C. Alonso-Blanco, Natural genetic  
959 variation of *Arabidopsis thaliana* is geographically structured in the Iberian peninsula.  
960 *Genetics*. **180**, 1009–1021 (2008).
- 961 48. D. Ortega-Del Vecchyo, C. D. Marsden, K. E. Lohmueller, PReFerSim: fast simulation of  
962 demography and selection under the Poisson Random Field model. *Bioinformatics*. **32**,  
963 3516–3518 (2016).
- 964 49. I. Frumkin *et al.*, Gene architectures that minimize cost of gene expression. *Mol. Cell*. **65**,  
965 142–153 (2017).

- 966 50. F. Gao, H. Luo, C.-T. Zhang, R. Zhang, Gene essentiality analysis based on DEG 10, an  
967 updated database of essential genes. *Methods Mol. Biol. Clifton NJ.* **1279**, 219–233 (2015).

968
